# Supplementary material for: The genomes of nucleocytoplasmic large DNA viruses: viral evolution writ large
Source: PubMed Central journal article supplement (PMC8715426; doi:10.1099/mgen.0.000649), 2021-09-20
Supplement: mgen-7-0649-s001.pdf [file mgen-7-0649-s001.pdf]

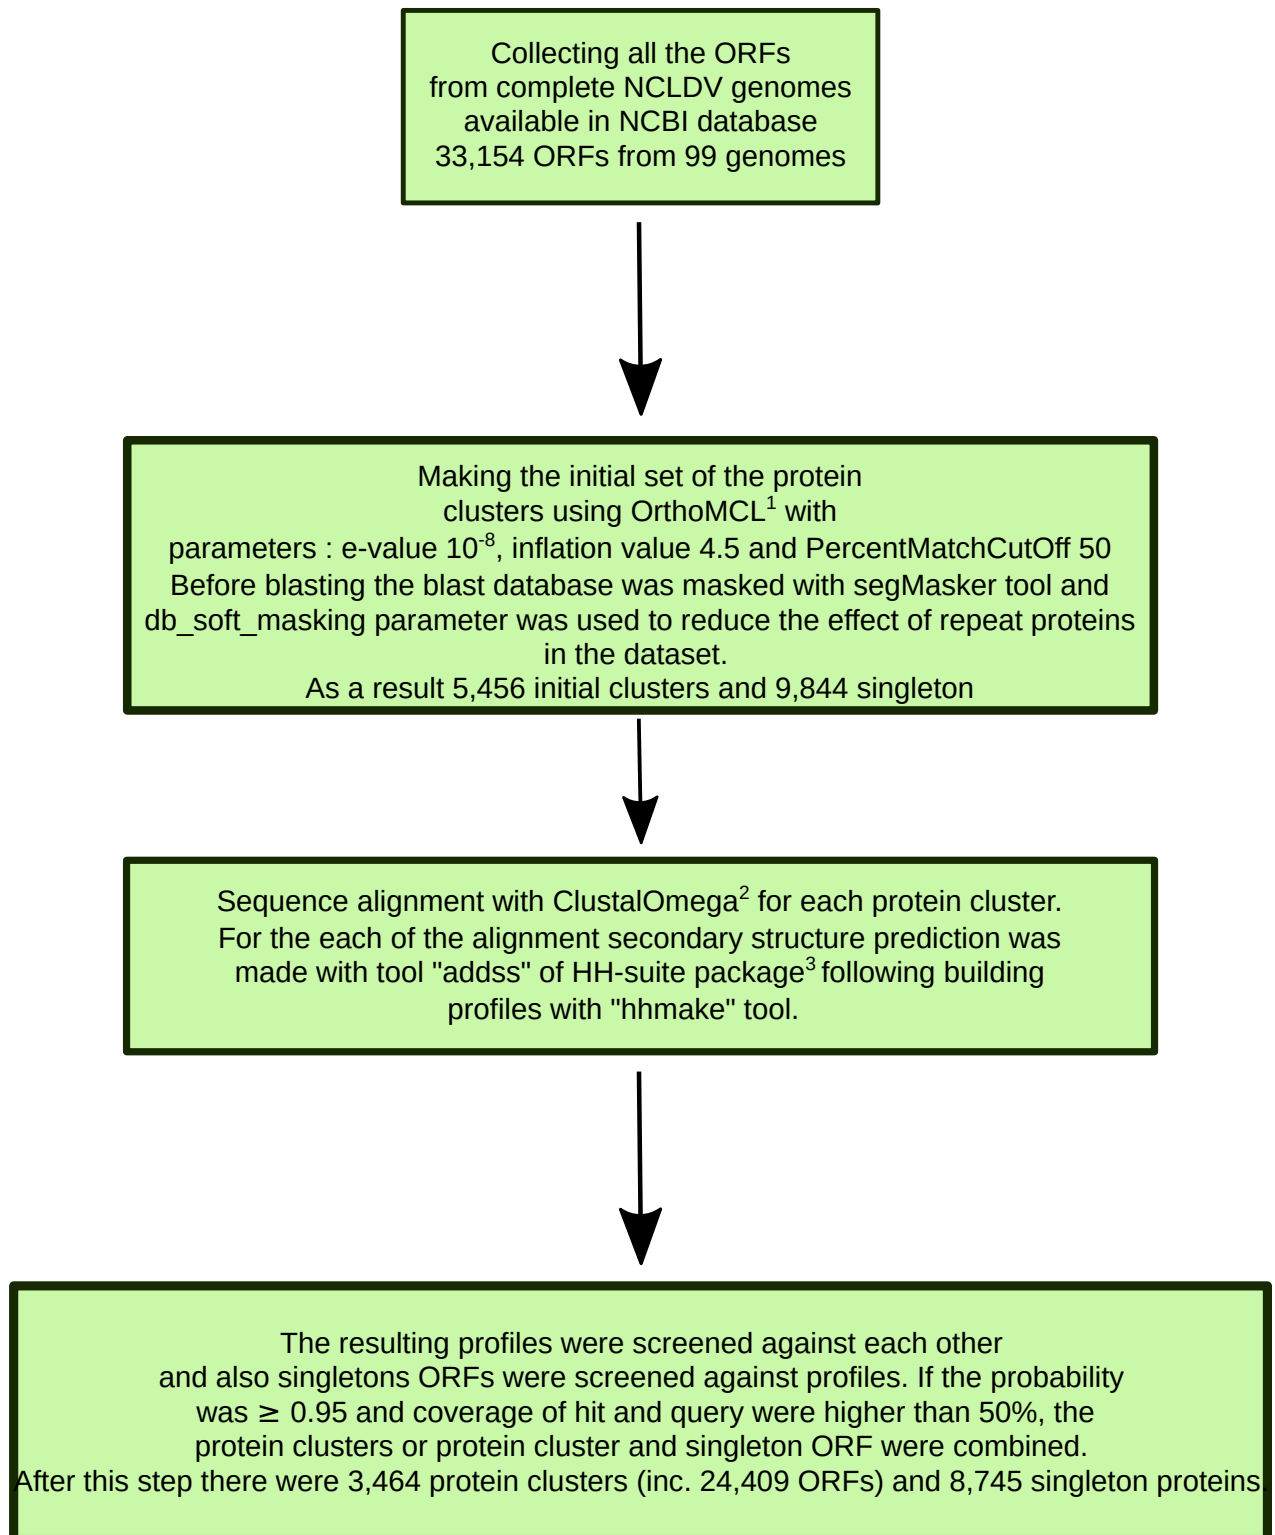

Supplementary Figure S1. Workchart for building of the protein clusters.

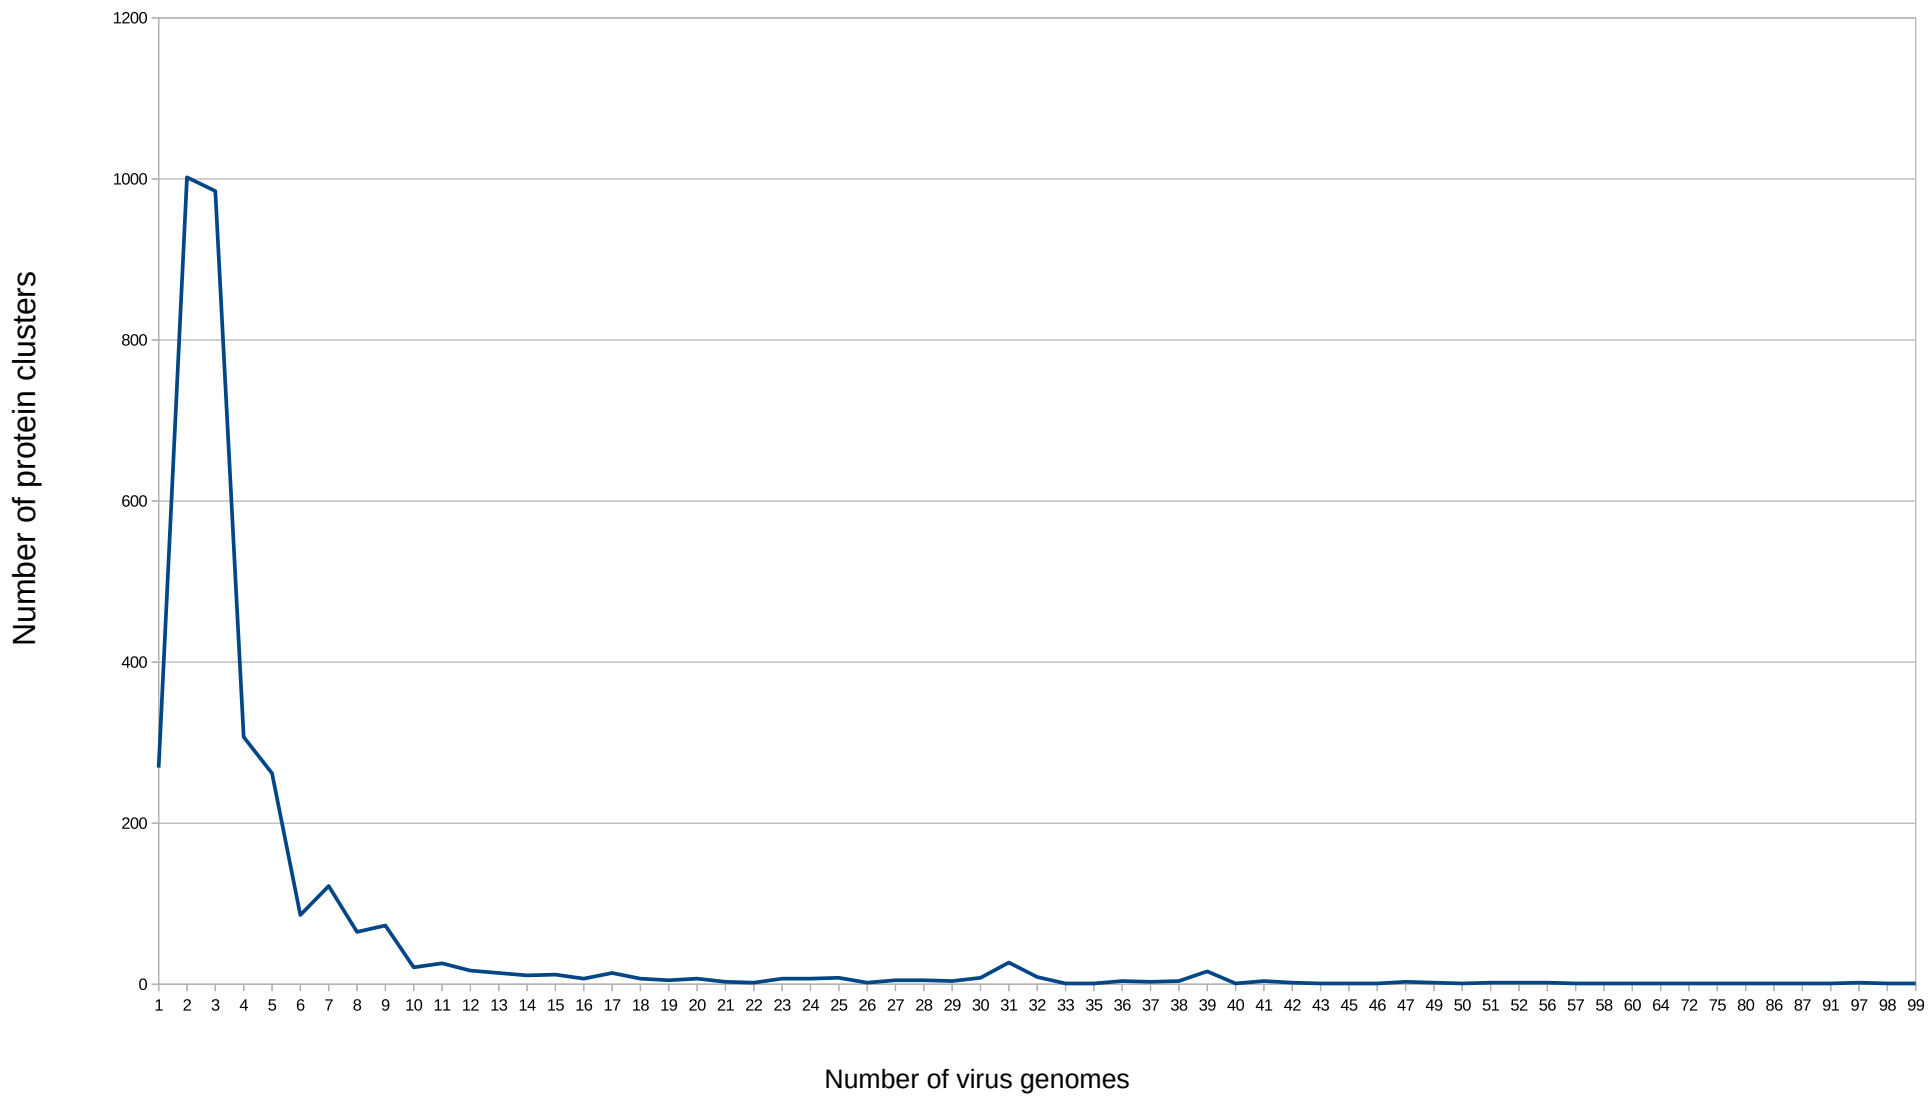

Supplementary Figure S2. Number of NCLDV genomes sharing a protein cluster. The graph shows how many protein clusters are shared by a certain number of NCLDV genomes.

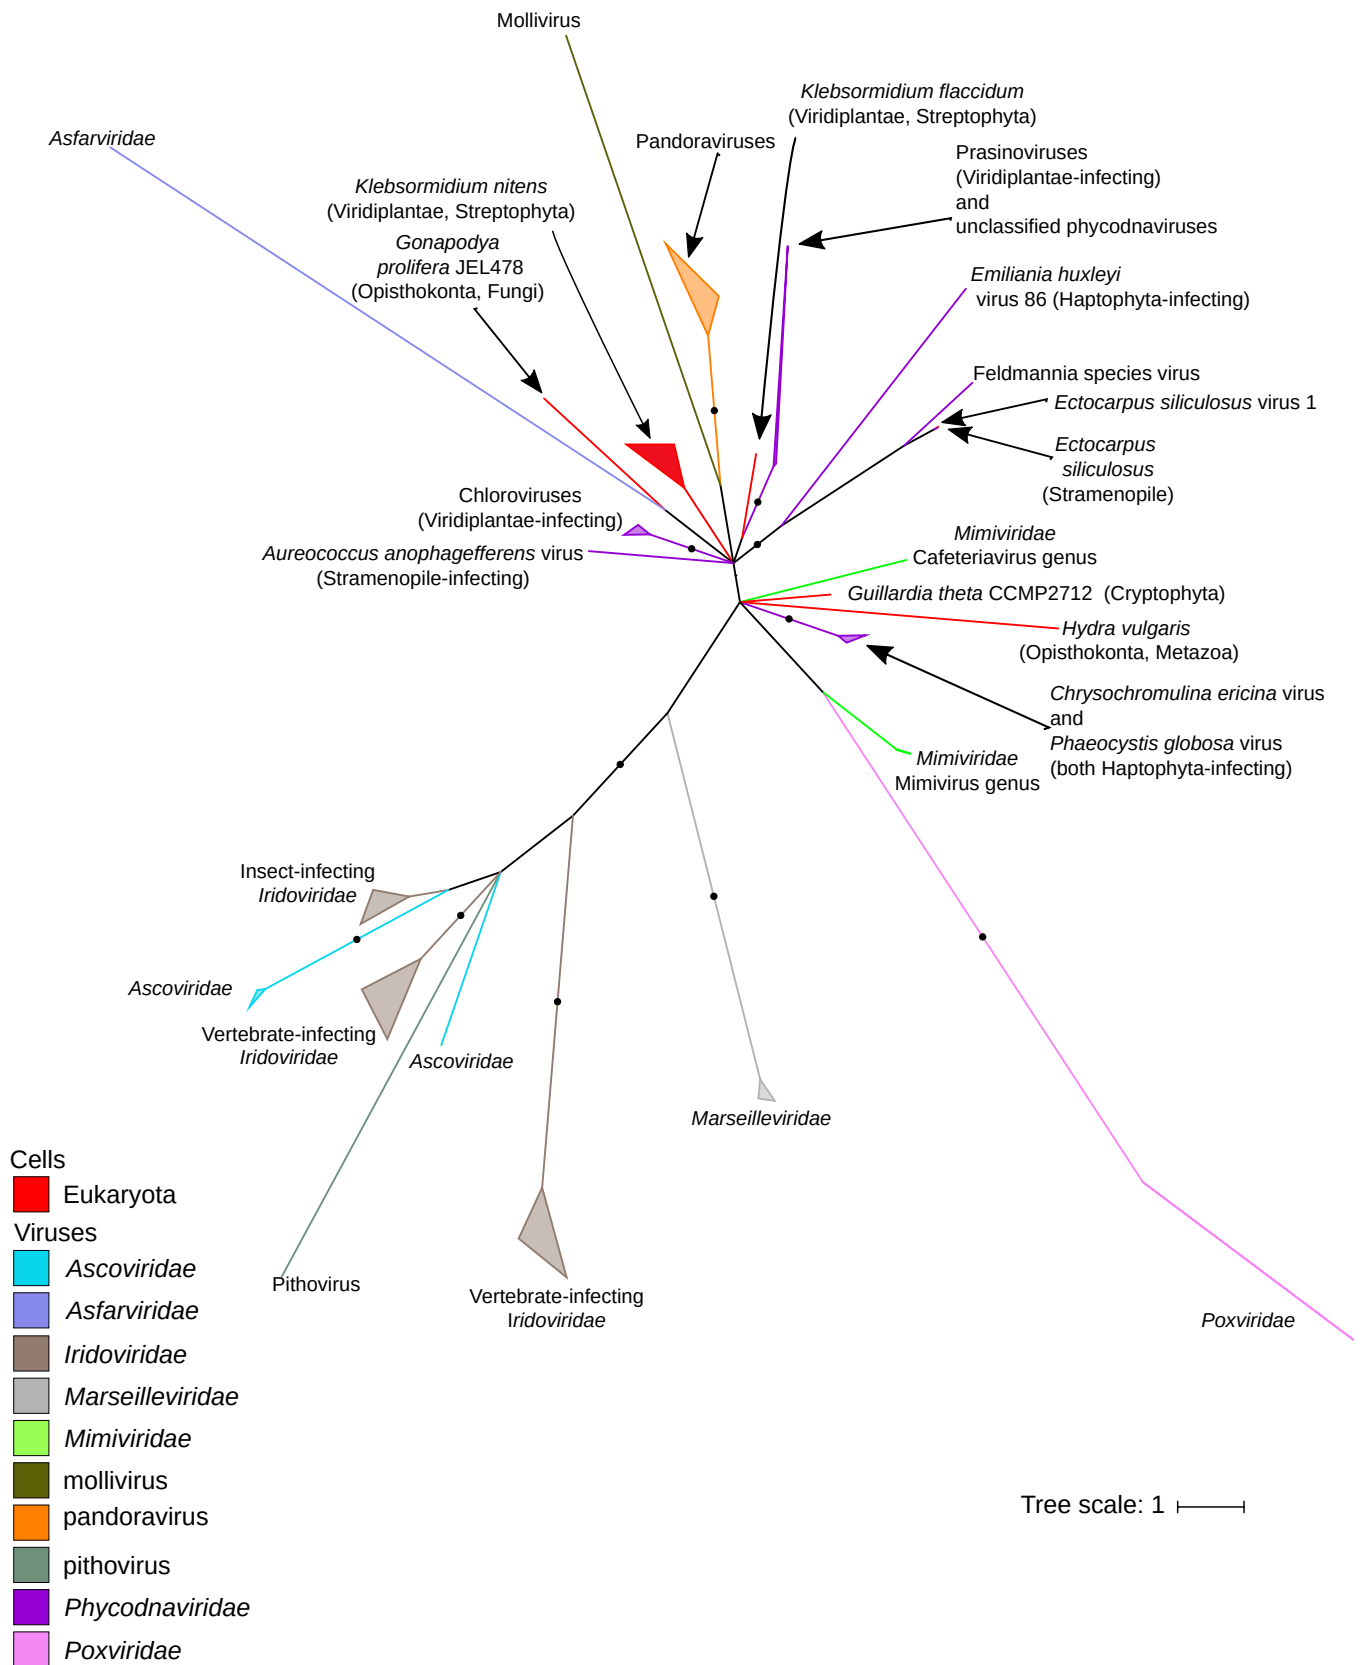

Supplementary Figure S3. Phylogeny of Poxvirus late transcription factor VLTF3-like (Pfamid: PF04947) open-reading frames. The tree is based on the amino acid sequences representing the protein cluster 1 in the Figure 1 (Identifier in the data set: cluster\_11) and the best five blastp hits outside NCLDVs for each NCLDV sequence (e-value <math>10^{-5}</math>). The screen was done against NCBI non-redundant protein database (downloaded on the 18th of July 2016). The proteins which length was less than 80 % from the average length of the VLTF3-like domain in the dataset, were removed. The eukaryotic sequences were checked for contaminants. The scaffold in which corresponding eukaryotic gene located, had to contain an ORF that received the best hit from an eukaryotic ORF in another scaffold. The alignment was performed using MAFFT v7 L-INS-i<sup>4</sup>. The alignment was trimmed using Trimal with "automated1" settings<sup>5</sup>. Sites present only in a single sequence, were removed. The length of final alignment was 150 sites for 110 sequences. The tree was inferred under LG+C60<sup>6,7</sup> model in PhyloBayes<sup>8</sup>. The posterior probabilities that are higher than 0.95 are indicated with black dots. iTOL<sup>9</sup> was used for visualization of the phylogeny.

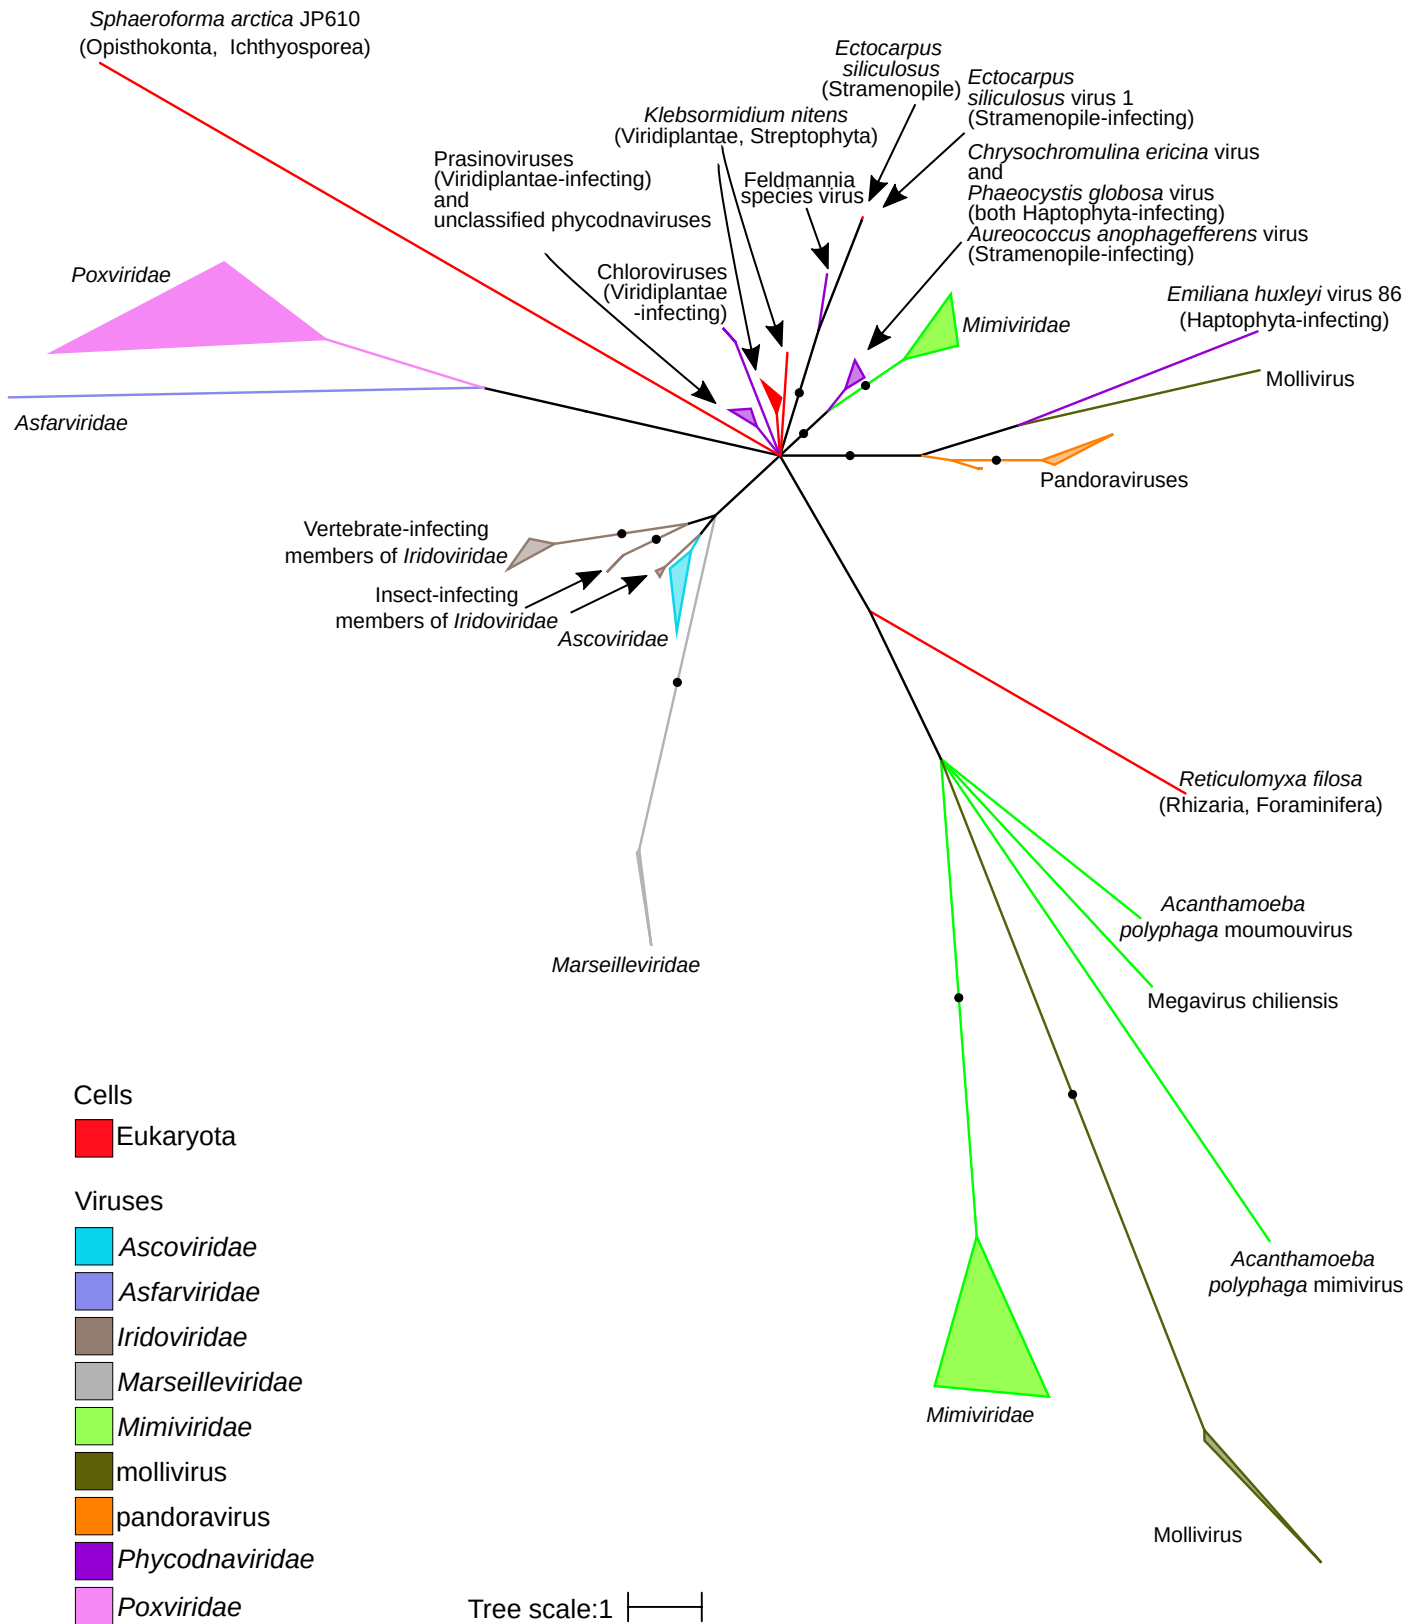

Supplementary Figure S4. Phylogenetic tree for Poxvirus A32 protein (packaging ATPase) (Pfam: PF04665). The tree is based on the amino acid sequences representing the protein cluster 2 in the Figure 1 (identifier in the data set: Cluster\_9). The tree was processed as described Supplementary Figure S3. The alignment was checked and sites conserved less than 30 % sites were removed. The lengths of the final alignments were 129 sites for 117 sequences.

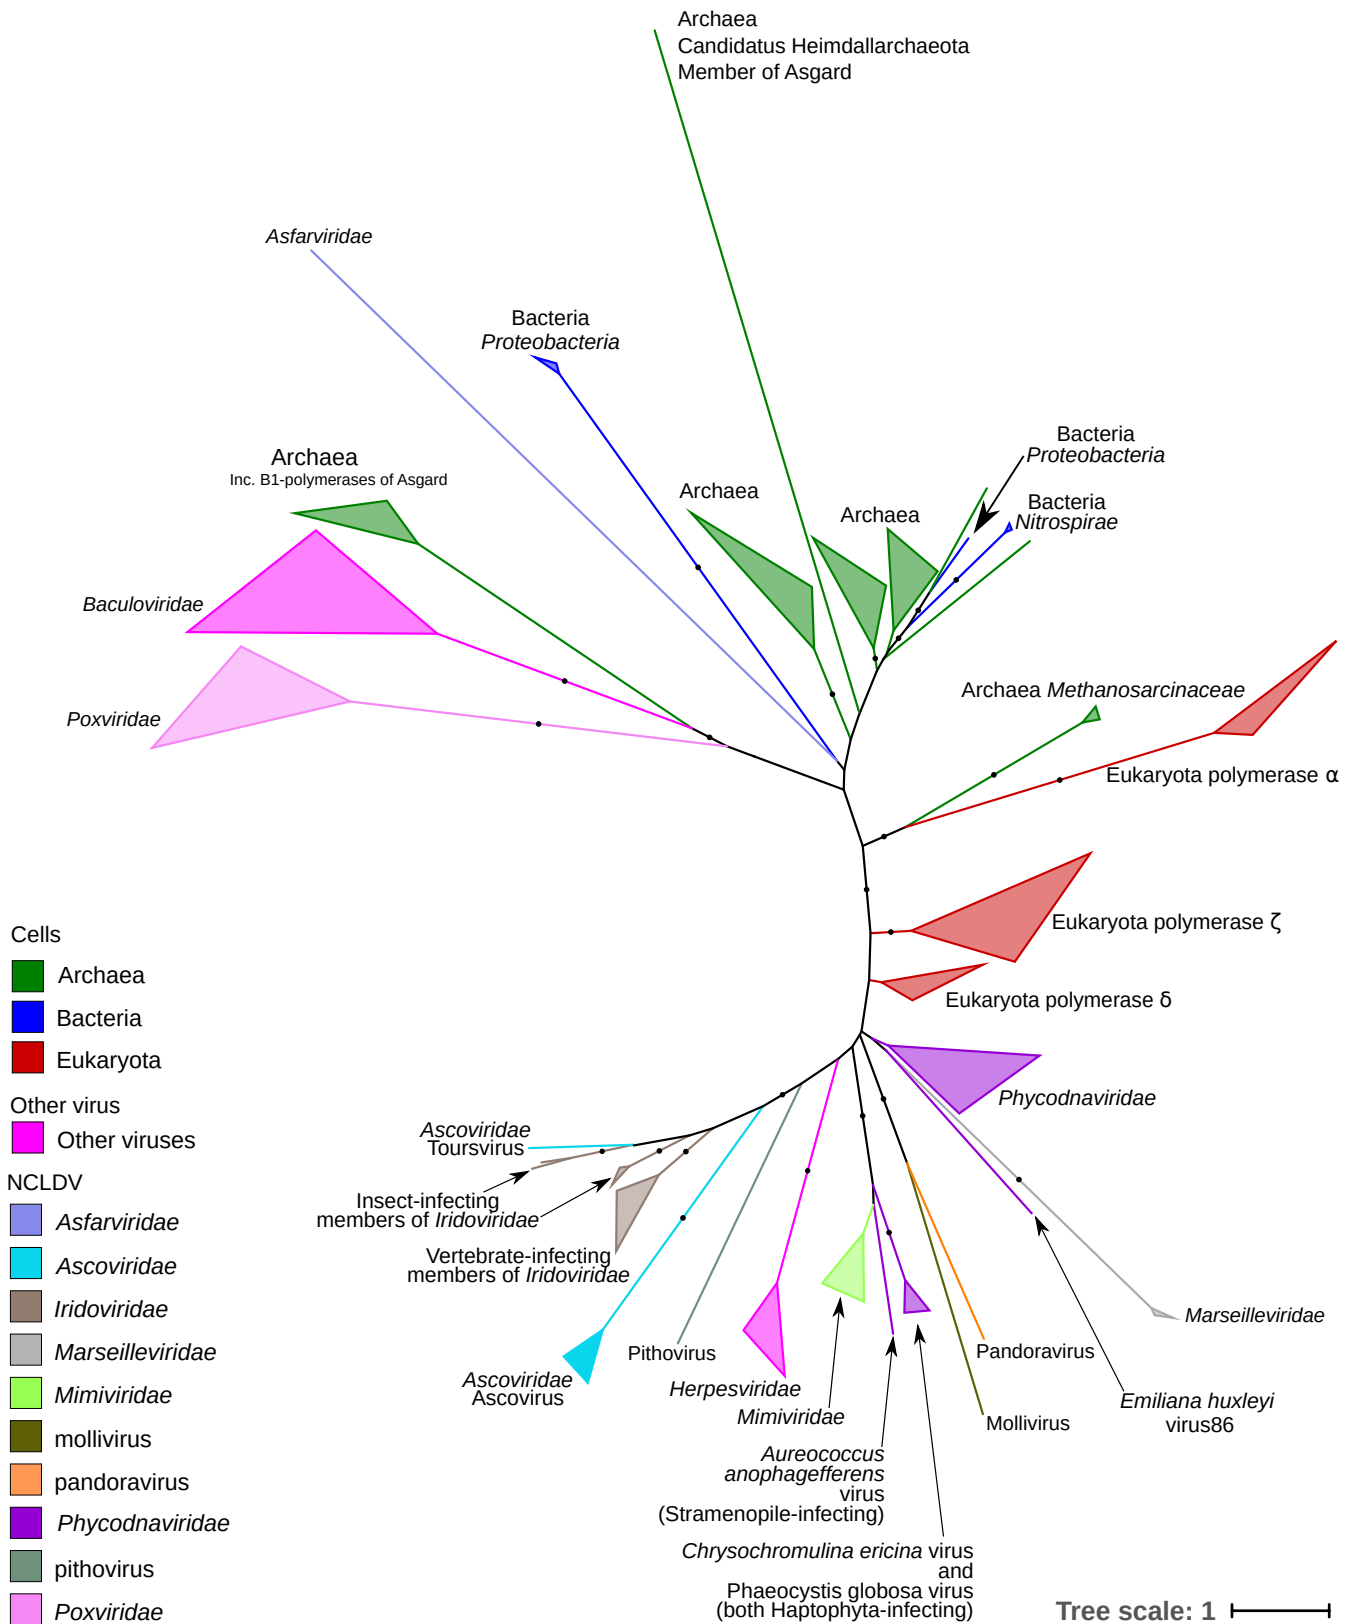

Supplementary Figure S5. Phylogenetic tree polymerase B family DNA polymerases (Pfamid: PF00136). The tree is based on the amino acid sequences representing the protein cluster 4 in the Figure 1 (identifier in the data set: cluster\_12), and the best five pblast hits outside NCLDVs for each NCLDV sequence (e-value <math>10^{-5}</math>). The screen was done against NCBI non-redundant protein database (downloaded on the 18th of July 2016). To expand the selection of sequences, more distant members of DNA polymerase were considered including representatives from all archaeal phylums as well as eukaryotic polymerases  $\delta$ ,  $\zeta$  and  $\alpha$ . Eukaryotic polymerase  $\epsilon$  and phage polymerases were left out due to short sequence similarity (they shortened the alignment from 334 sites to 192 sites). As polymerase proteins contain multiple domains that may disturb the alignment, the polymerase domains were identified using Interproscan<sup>10</sup>, and to confirm the completeness of the domain, 100 amino acids were added at the both ends. These extracted sequences were processed and aligned as in the Supplementary Figure S3. The tree was inferred under LG+C60<sup>6,7</sup> model in IQ-TREE<sup>11</sup> with ultrafast bootstrap<sup>12</sup>, because the tree did not converged in PhyloBayes. The ultrafast bootstrap values that are higher than 0.95 are indicated with black dots.

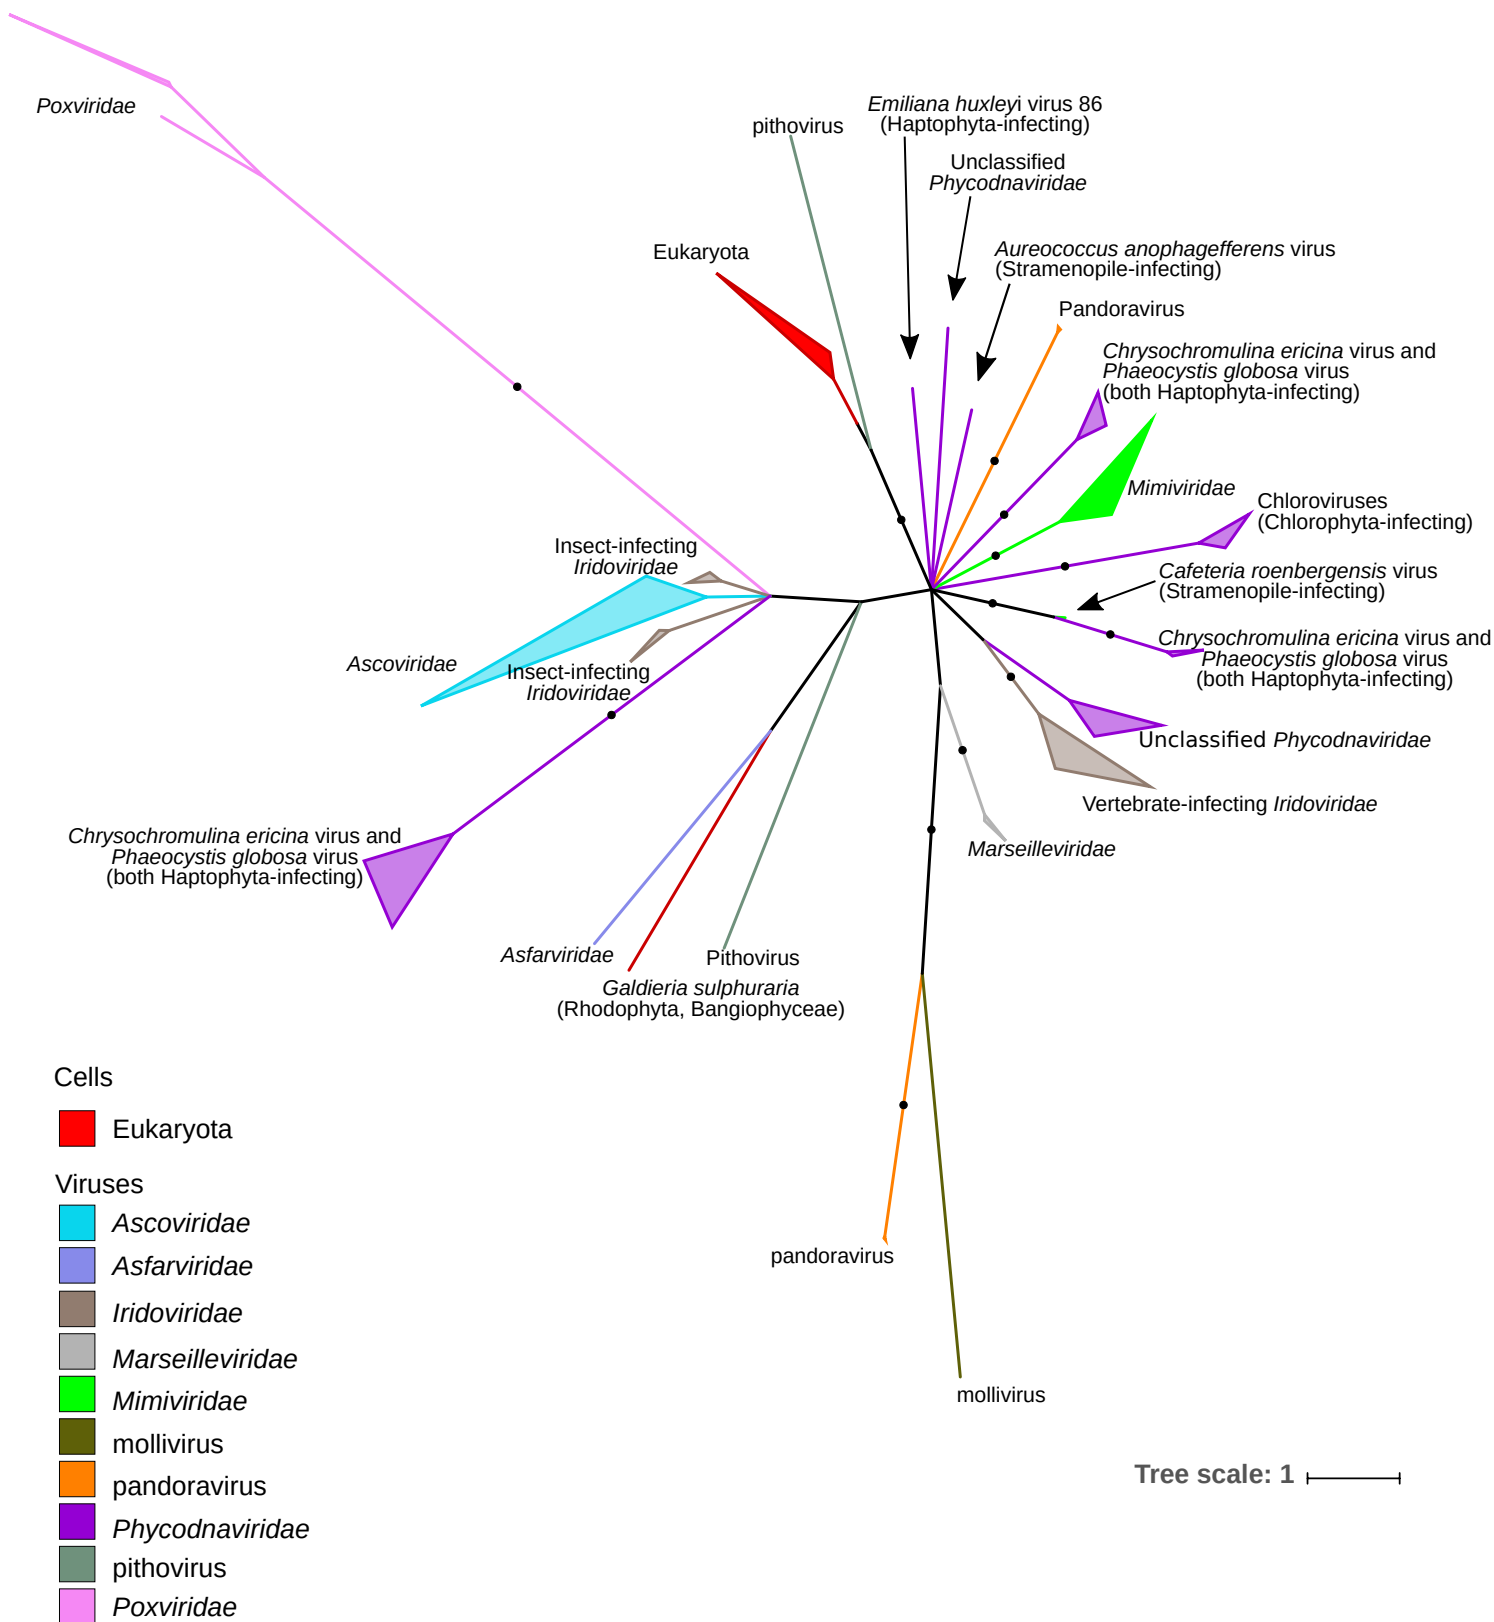

Supplementary Figure S6. Phylogenetic tree for disulfide (thiol) oxidoreductase, Erv1/Alr family (Pfam: PF04777). The tree is based on the amino acid sequences representing the protein cluster 6 in the Figure 1 (identifier in the dataset: cluster\_13). The sequences were selected, processed and aligned as in Supplementary Figure S3. Eukaryotic sequences locating in independent branches separately from the other eukaryotic sequences were screened for potential contaminants. The length of the final alignment was 80 sites for 261 sequences.

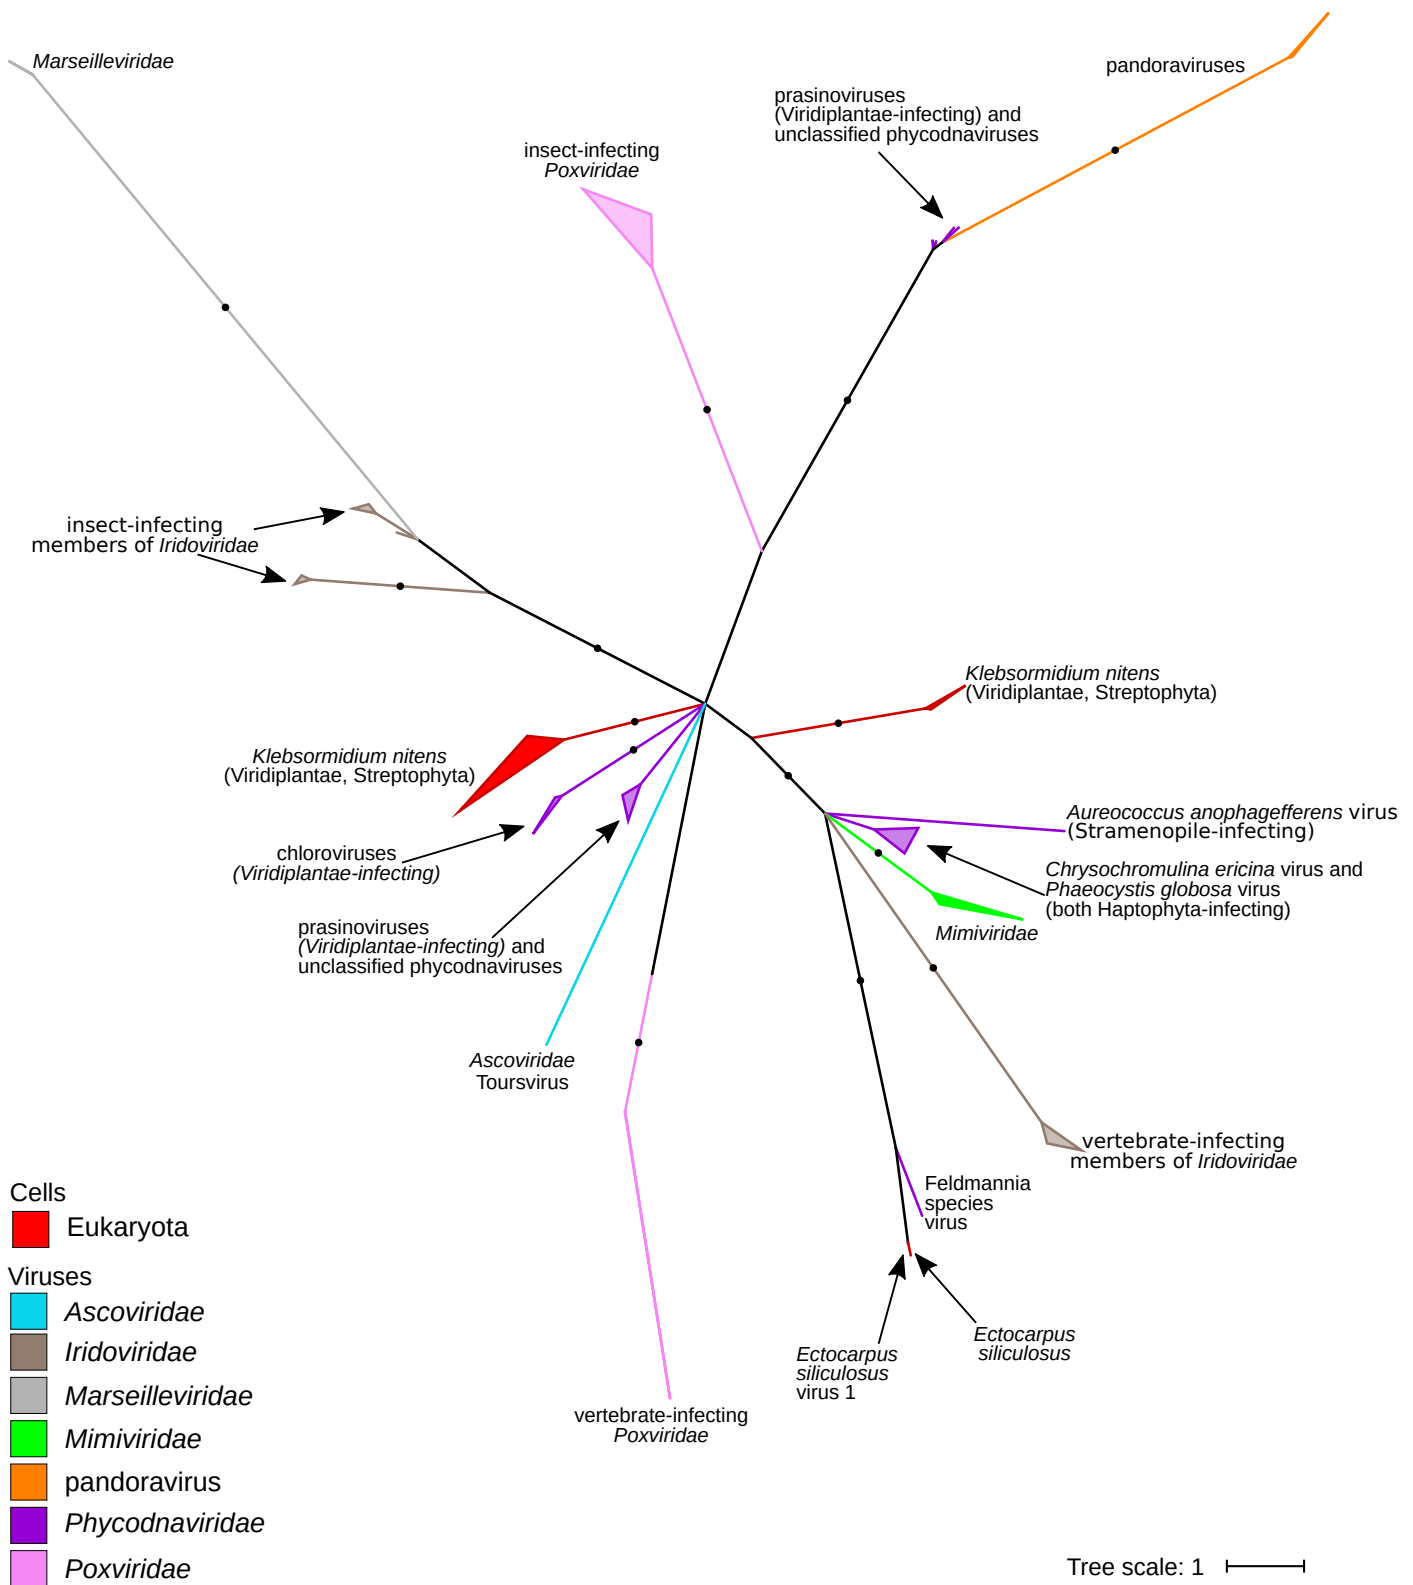

Supplementary Figure S7. Phylogenetic tree for Poxvirus A22 protein (Pfamid: PF04848). The tree is based on the amino acid sequences representing the protein cluster 7 in the Figure 1 (identifier in the dataset: cluster\_15). The sequences were selected, processed and aligned and phylogeny made as in Supplementary Figure S3. The length of the final alignment was 98 sites for 95 sequences.

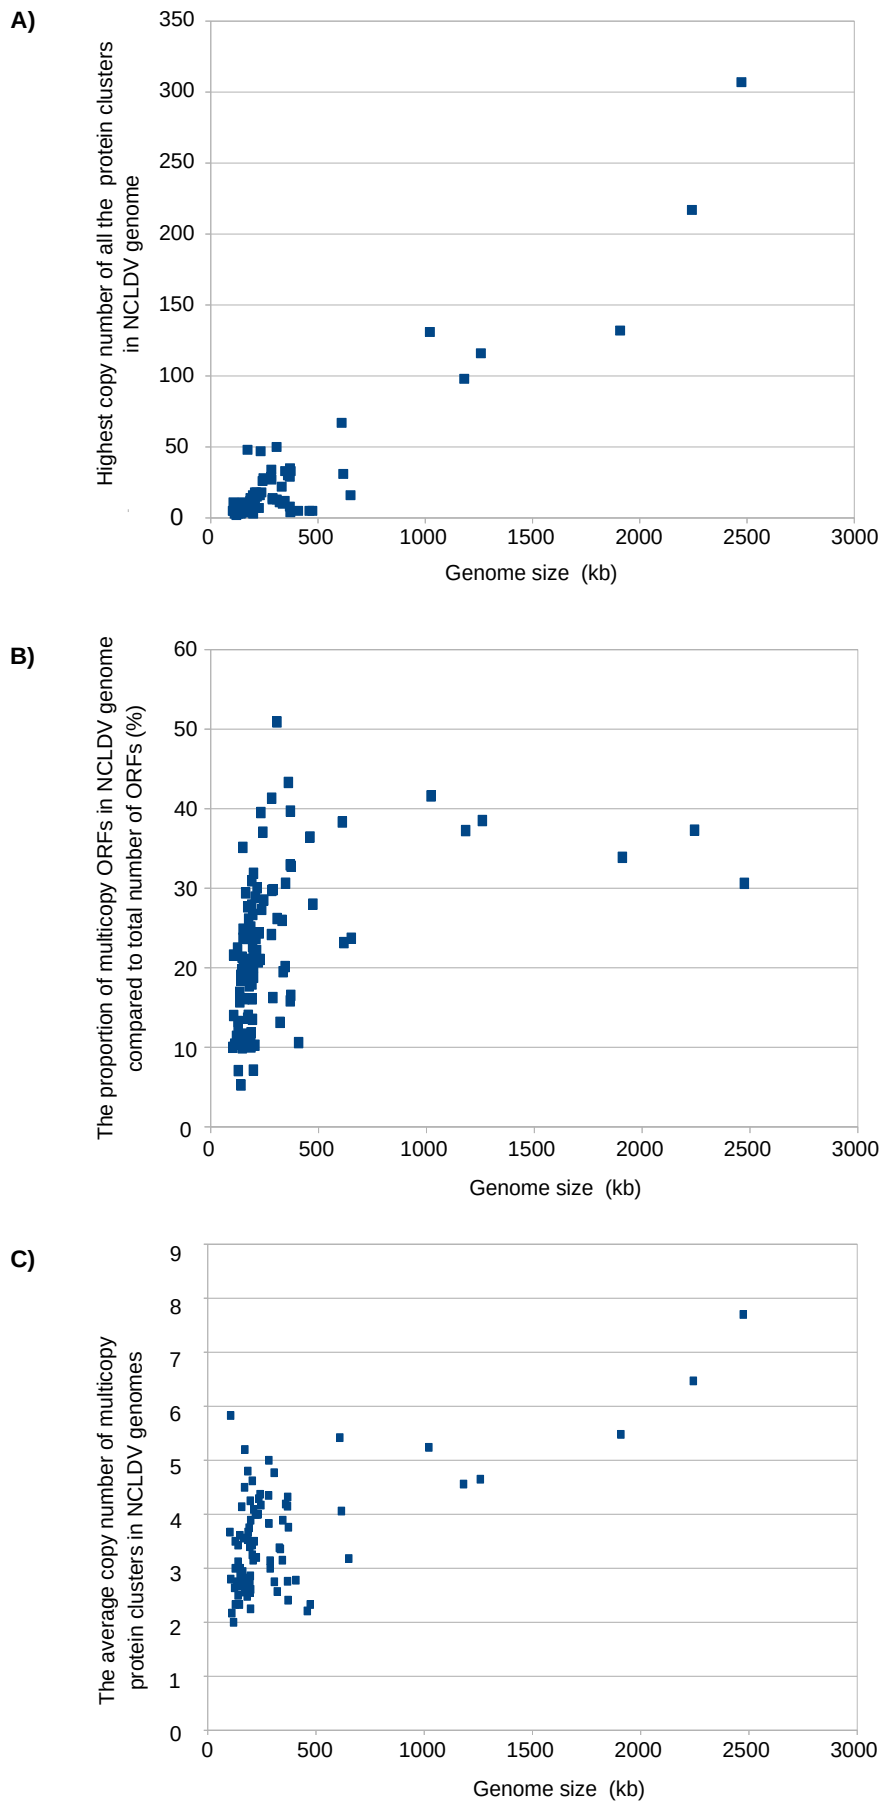

Supplementary Figure S8. Copy number variation in NCLDV genomes. The copy number for each protein cluster within each NCLDV genome was calculated. From these data three scatter plots were generated. The highest copy number of all protein clusters in each NCLDV genome compared to the NCLDV genome size (A), the proportion of multicopying ORFs (>2) within a NCLDV genome compared to the NCLDV genome size (B). The average copy number of protein clusters (single copy proteins were left out) compared to the NCLDV genome size (C).



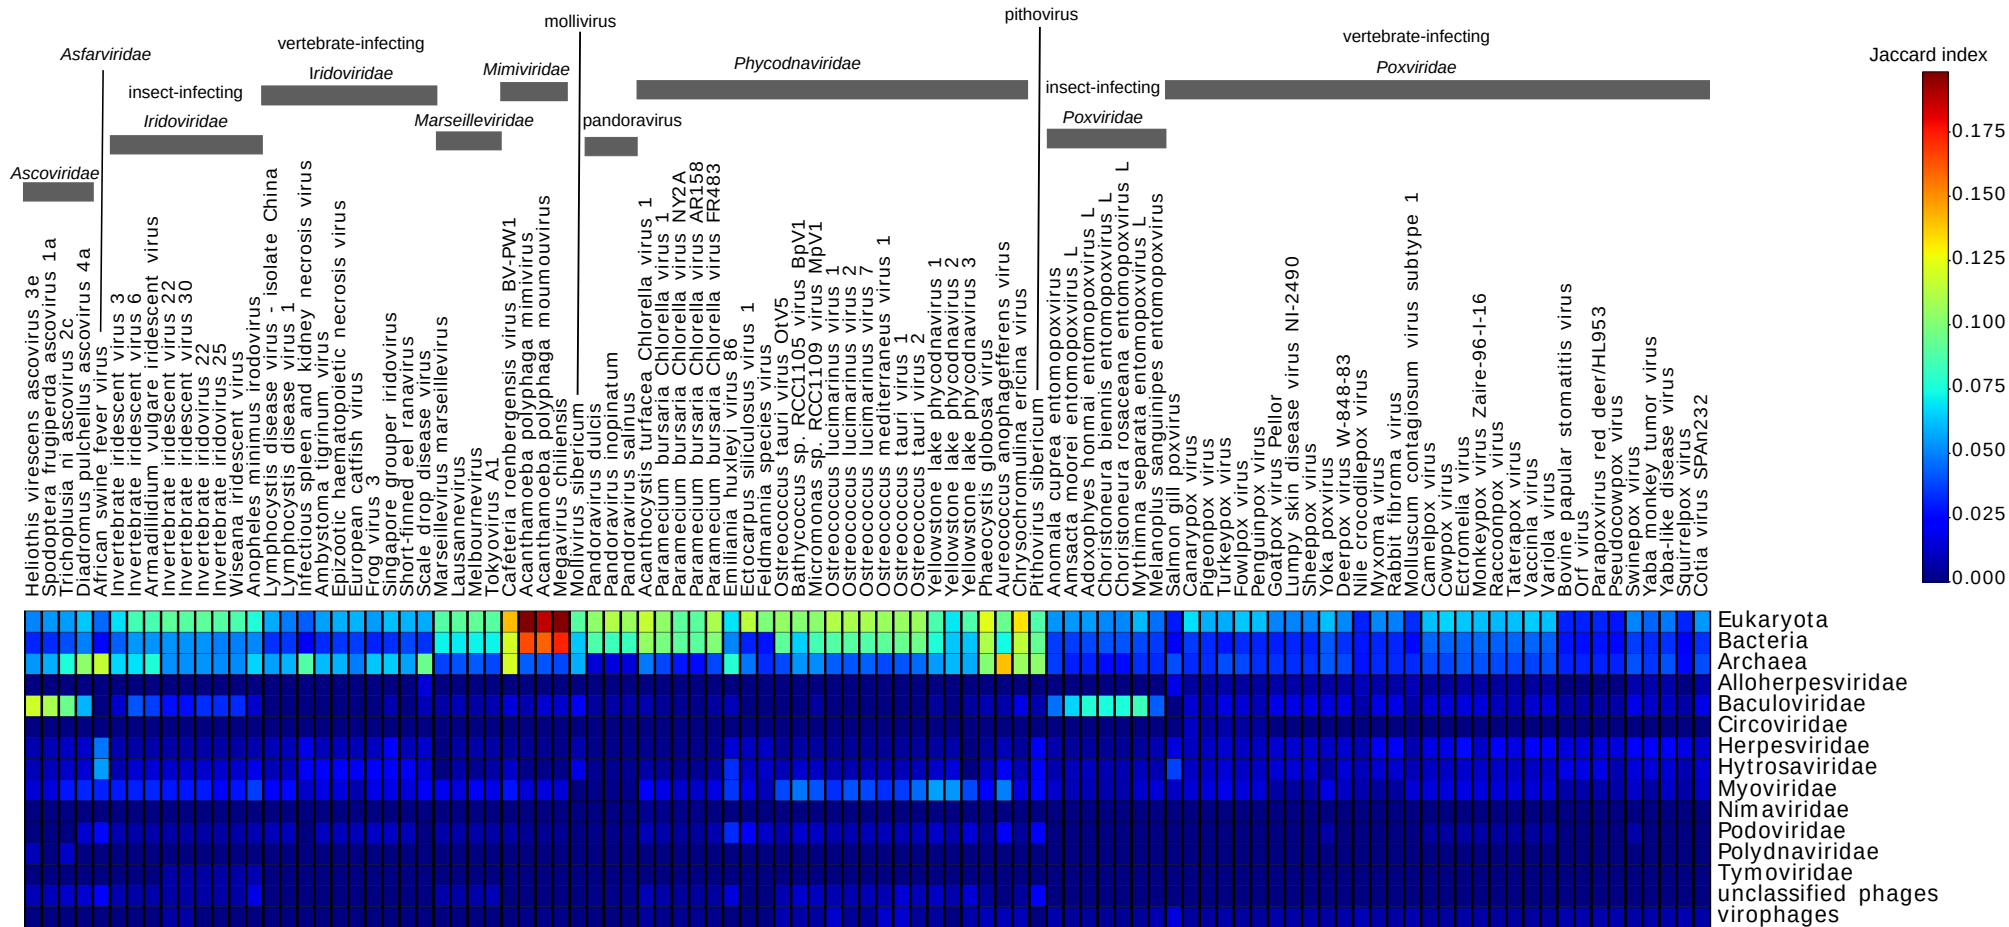

Supplementary Figure S9. The Jaccard indices indicating proportion of shared protein clusters between NCLDVs and cellular life or other viruses. The Jaccard index describes the size of intersections between two groups. The higher the Jaccard index is the bigger is the proportion of the shared protein clusters. The Jaccard indices are calculated from bipartite network in Figure 3. The protein cluster is considered to be present in cellular life or other viruses if at least one protein cluster member receives a protein blast hit outside NCLDVs from cellular life or other virus. The screen was done against NCBI non-redundant protein database that was downloaded on the 18th of July 2016. NCLDV species and families are shown on the top of the heatmap and cellular life or virus taxonomy on the right. The Jaccard index scale is presented on the right.

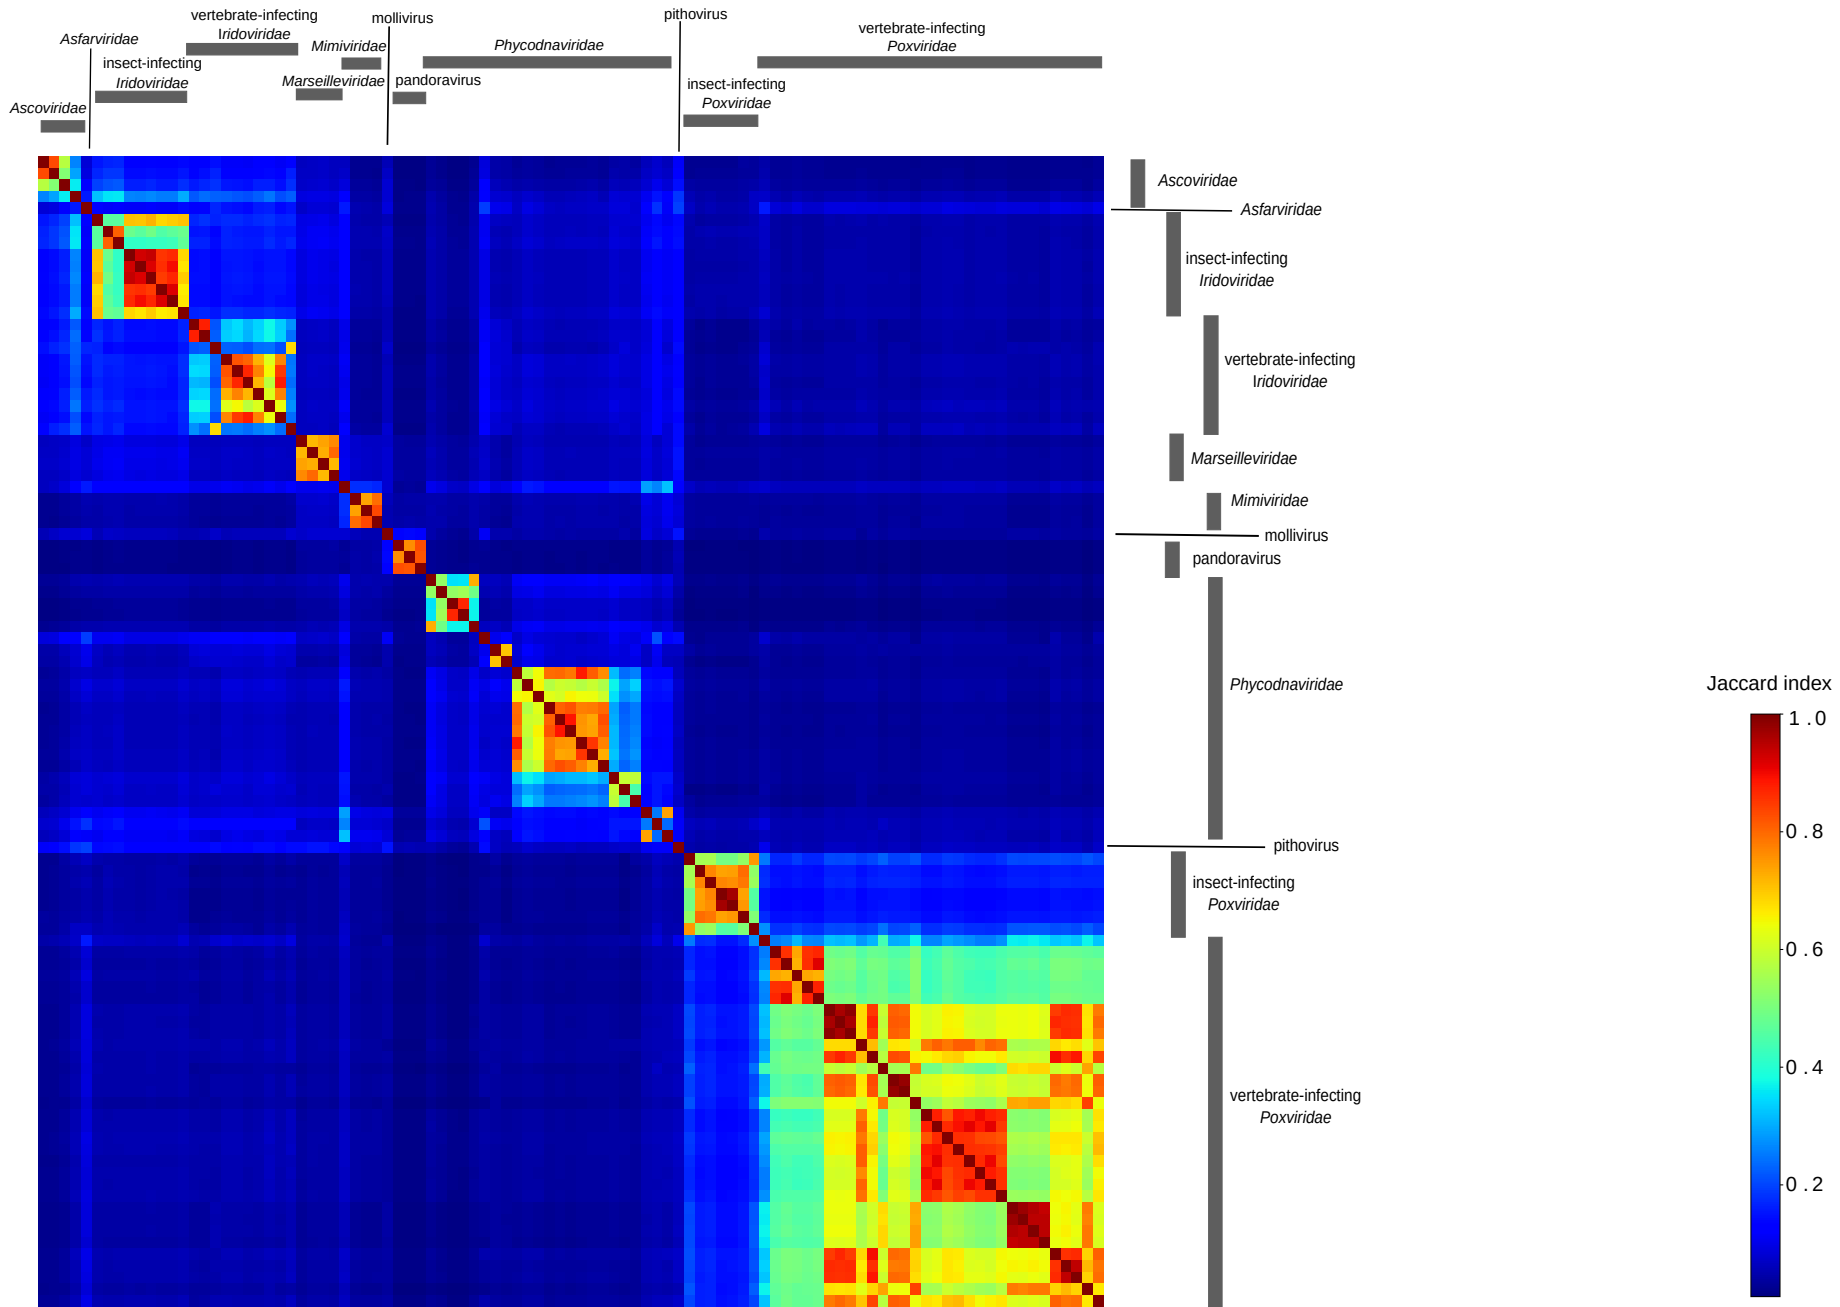

Supplementary Figure S10. Heatmap of the Jaccard indices indicating the proportion of shared protein clusters between the NCLDV genomes. The Jaccard index describes the size of intersections between two groups. The higher the Jaccard index is, the bigger is the proportion of the shared protein clusters. The Jaccard indices are calculated from the bipartite network in Figure 3. The screen was done against NCBI non-redundant protein database (downloaded on the 18th of July 2016). NCLDV families or groups are indicated with bars and lines on the right side and top of the heatmap. The Jaccard index scale is presented on the right.

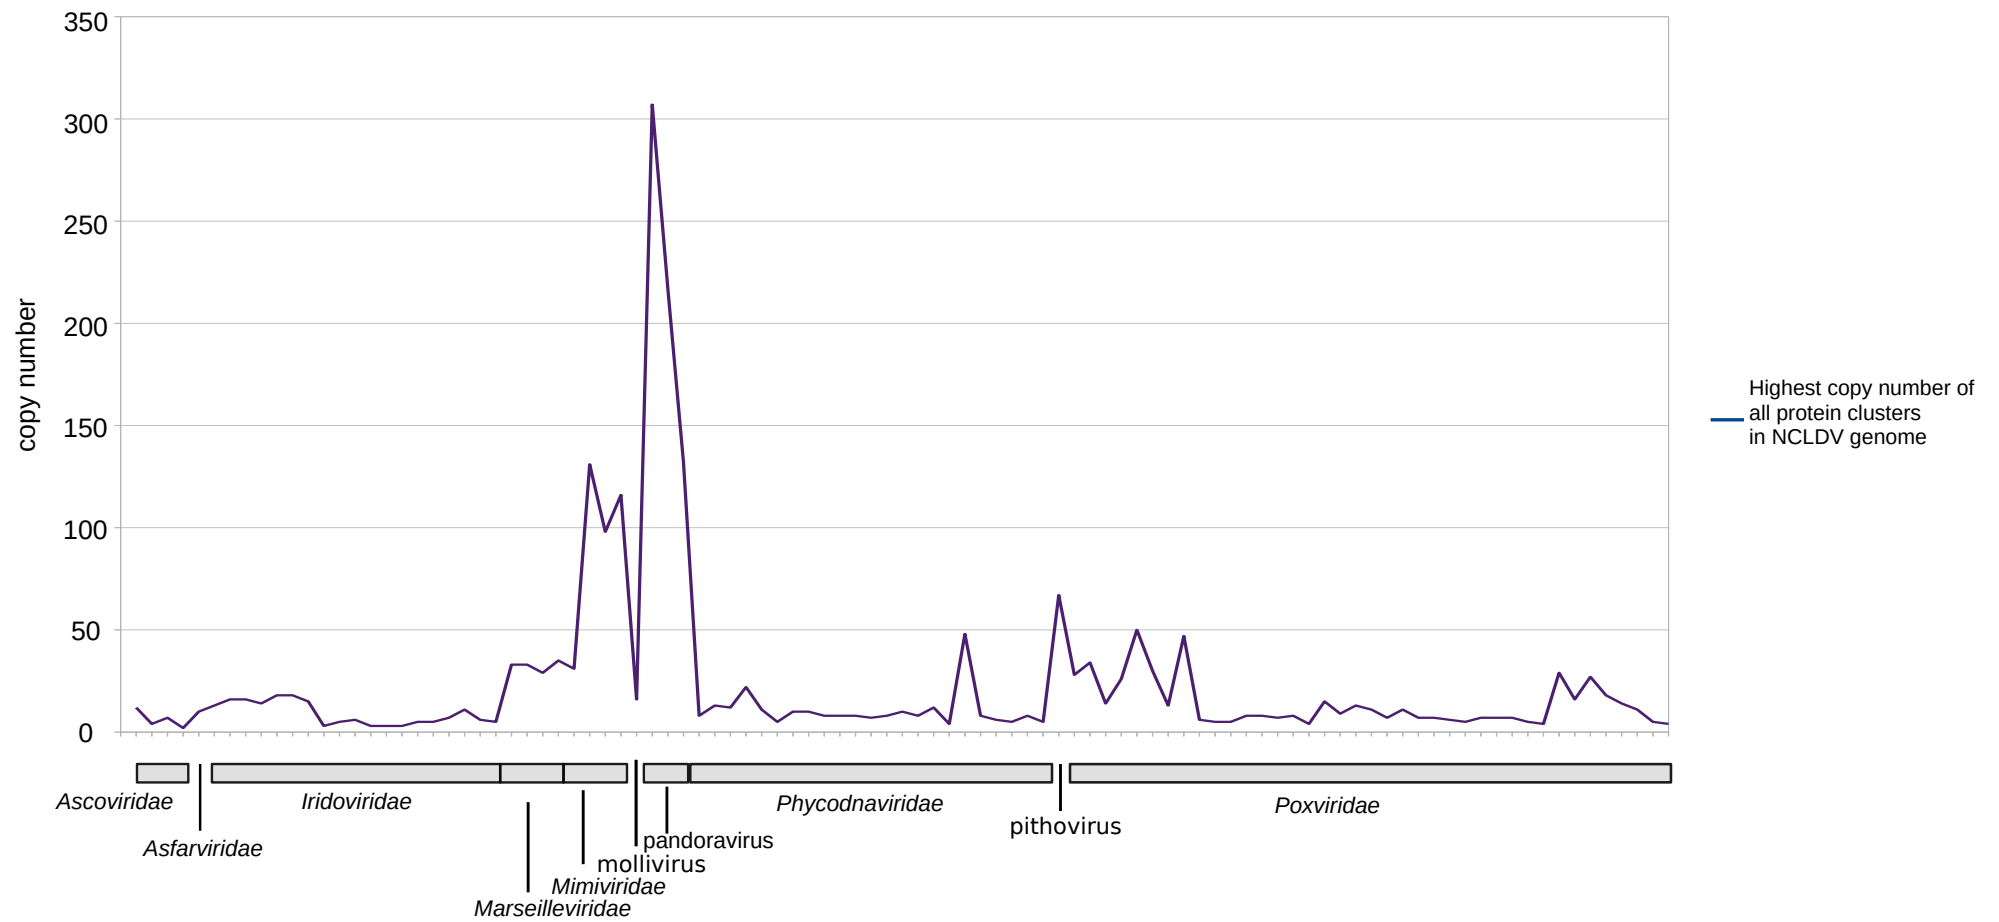

Supplementary Figure S11. The highest copy number of all the protein clusters in each NCLDV genome. The copy number of each protein cluster within each NCLDV genome was counted. The highest copy number for each genome is plotted on the graph. The NCLDV lineages are presented on the x axis.

Supplementary Table S1. The NCLDV genome assemblies used in the study

| Number | Family/genus     | Species                                          | Accession (NCBI assembly) | Reference |
|--------|------------------|--------------------------------------------------|---------------------------|-----------|
| 1      | Ascoviridae      | <i>Heliothis virescens ascovirus 3e</i>          | GCF_000871485.1           | 13        |
| 2      | Ascoviridae      | <i>Spodoptera frugiperda ascovirus 1a</i>        | GCF_000867605.1           | 14        |
| 3      | Ascoviridae      | <i>Trichoplusia ni ascovirus 2c</i>              | GCF_000868565.1           | 15        |
| 4      | Ascoviridae      | <i>Diadromus pulchellus ascovirus 4a</i>         | GCF_000881595.1           | 16        |
| 5      | Asfarviridae     | African swine fever virus                        | GCF_000858485.1           | 17        |
| 6      | Iridoviridae     | Invertebrate iridescent virus 3                  | GCF_000869125.1           | 18        |
| 7      | Iridoviridae     | Invertebrate iridescent virus 6                  | GCF_000838105.1           | 19        |
| 8      | Iridoviridae     | <i>Armadillidium vulgare iridescent virus</i>    | GCF_000923155.1           | 20        |
| 9      | Iridoviridae     | Invertebrate iridescent virus 22                 | GCF_000916235.1           | 21        |
| 10     | Iridoviridae     | Invertebrate iridescent virus 30                 | GCF_000915575.1           | 21        |
| 11     | Iridoviridae     | Invertebrate iridovirus 22                       | GCF_000909775.1           | 22        |
| 12     | Iridoviridae     | Invertebrate iridovirus 25                       | GCF_000914535.1           | 23        |
| 13     | Iridoviridae     | <i>Wiseana iridescent virus</i>                  | GCF_000891235.1           | 24        |
| 14     | Iridoviridae     | <i>Anopheles minimus iridovirus</i>              | GCF_000918955.1           | 25        |
| 15     | Iridoviridae     | Lymphocystis disease virus - isolate China       | GCF_000844885.1           | 26        |
| 16     | Iridoviridae     | Lymphocystis disease virus 1                     | GCF_000839605.1           | 27        |
| 17     | Iridoviridae     | Infectious spleen and kidney necrosis virus      | GCF_000848865.1           | 28        |
| 18     | Iridoviridae     | <i>Ambystoma tigrinum stebbensi virus</i>        | GCF_000841005.1           | 29        |
| 19     | Iridoviridae     | Epicotic haematopoietic necrosis virus           | GCF_001448375.1           | 30        |
| 20     | Iridoviridae     | European catfish virus                           | GCF_000897115.1           | 31        |
| 21     | Iridoviridae     | Frog virus 3                                     | GCF_000844425.1           | 32        |
| 22     | Iridoviridae     | Singapore grouper iridovirus                     | GCF_000846905.1           | 33        |
| 23     | Iridoviridae     | Short-finned eel ranavirus                       | GCF_001678255.1           | 34        |
| 24     | Iridoviridae     | Scale drop disease virus                         | GCF_001274405.1           | 35        |
| 25     | Marseilleviridae | <i>Marseillevirus marseillevirus</i>             | GCF_000887095.1           | 26        |
| 26     | Marseilleviridae | <i>Lausannevirus</i>                             | GCF_000893455.1           | 37        |
| 27     | Marseilleviridae | <i>Melbournevirus</i>                            | GCF_000924835.1           | 38        |
| 28     | Marseilleviridae | <i>Tokiovirus A1</i>                             | GCF_001654305.1           | 39        |
| 29     | Miniviridae      | <i>Caletia roenbergensis virus BV-PW1</i>        | GCF_000889395.1           | 40        |
| 30     | Miniviridae      | <i>Acanthamoeba polyphaga mimivirus</i>          | GCF_000888735.1           | 41        |
| 31     | Miniviridae      | <i>Acanthamoeba polyphaga moumouvirus</i>        | GCF_000904035.1           | 42        |
| 32     | Miniviridae      | <i>Megavirus chilensis</i>                       | GCF_000893915.1           | 43        |
| 33     | Mollivirus       | <i>Mollivirus sibiricum</i>                      | GCF_001292995.1           | 44        |
| 34     | Pandoravirus     | <i>Pandoravirus dulcis</i>                       | GCF_000911655.1           | 45        |
| 35     | Pandoravirus     | <i>Pandoravirus inopinatum</i>                   | GCF_000928575.1           | 46        |
| 36     | Pandoravirus     | <i>Pandoravirus salinus</i>                      | GCF_000911955.1           | 45        |
| 37     | Phycodnaviridae  | <i>Acanthocystis turfacea Chlorella virus 1</i>  | GCF_000869685.1           | 47        |
| 38     | Phycodnaviridae  | <i>Paramecium bursaria Chlorella virus 1</i>     | GCF_000847045.1           | 48        |
| 39     | Phycodnaviridae  | <i>Paramecium bursaria Chlorella virus NYZA</i>  | GCF_000873685.1           | 49        |
| 40     | Phycodnaviridae  | <i>Paramecium bursaria Chlorella virus AR158</i> | GCF_000871245.1           | 49        |
| 41     | Phycodnaviridae  | <i>Paramecium bursaria Chlorella virus FR483</i> | GCF_000867825.1           | 50        |
| 42     | Phycodnaviridae  | <i>Emiliana huxleyi virus 86</i>                 | GCF_000865825.1           | 51        |
| 43     | Phycodnaviridae  | <i>Ectocarpus siliculosus virus 1</i>            | GCF_000839765.1           | 52        |
| 44     | Phycodnaviridae  | <i>Feldmannia species virus</i>                  | GCF_000874805.1           | 53        |
| 45     | Phycodnaviridae  | <i>Ostreococcus tauri virus OTV5</i>             | GCF_000872425.2           | 54        |
| 46     | Phycodnaviridae  | <i>Bathycoccus sp. RCC1105 virus BpV1</i>        | GCF_000889515.1           | 55        |
| 47     | Phycodnaviridae  | <i>Micromonas sp. RCC1109 virus MjV1</i>         | GCF_000890375.1           | 55        |
| 48     | Phycodnaviridae  | <i>Ostreococcus lucimarinus virus 1</i>          | GCF_00088835.1            | 55        |
| 49     | Phycodnaviridae  | <i>Ostreococcus lucimarinus virus 2</i>          | GCF_001399285.1           | 56        |
| 50     | Phycodnaviridae  | <i>Ostreococcus lucimarinus virus 7</i>          | GCF_001399225.1           | 56        |
| 51     | Phycodnaviridae  | <i>Ostreococcus mediterraneus virus 1</i>        | GCF_001399265.1           | 56        |
| 52     | Phycodnaviridae  | <i>Ostreococcus tauri virus 1</i>                | GCF_000889975.1           | 57        |
| 53     | Phycodnaviridae  | <i>Ostreococcus tauri virus 2</i>                | GCF_000887855.1           | 58        |
| 54     | Phycodnaviridae  | <i>Yellowstone lake phycodnavirus 1</i>          | GCF_001430655.1           | 59        |
| 55     | Phycodnaviridae  | <i>Yellowstone lake phycodnavirus 2</i>          | GCF_001430455.1           | 59        |
| 56     | Phycodnaviridae  | <i>Yellowstone lake phycodnavirus 3</i>          | GCF_001430035.1           | 59        |
| 57     | Phycodnaviridae  | <i>Phaeocystis globosa virus</i>                 | GCF_000907415.1           | 60        |
| 58     | Phycodnaviridae  | <i>Aureococcus anophagefferens virus</i>         | GCF_000922335.1           | 61        |
| 59     | Phycodnaviridae  | <i>Chrysochromulina ericina virus</i>            | GCF_001399245.1           | 62        |
| 60     | Pithovirus       | <i>Pithovirus sibiricum</i>                      | GCF_000916835.1           | 63        |
| 61     | Poxviridae       | <i>Anomala cuprea entomopoxvirus</i>             | GCF_000865825.1           | 64        |
| 62     | Poxviridae       | <i>Amsacta moorei entomopoxvirus</i>             | GCF_000837185.1           | 65        |
| 63     | Poxviridae       | <i>Adoxophyes honmai entomopoxvirus L'</i>       | GCF_000427135.1           | 66        |
| 64     | Poxviridae       | <i>Choristoneura biennis entomopoxvirus</i>      | GCF_000427115.1           | 66        |
| 65     | Poxviridae       | <i>Choristoneura rosaceana entomopoxvirus L'</i> | GCF_000427175.1           | 66        |
| 66     | Poxviridae       | <i>Mythimna separata entomopoxvirus L'</i>       | GCF_000427155.1           | 66        |
| 67     | Poxviridae       | <i>Melanoplus sanguinipes entomopoxvirus</i>     | GCF_000838565.1           | 67        |
| 68     | Poxviridae       | <i>Salmon gill poxvirus</i>                      | GCF_001271235.1           | 68        |
| 69     | Poxviridae       | <i>Canarypox virus</i>                           | GCF_000841685.1           | 69        |
| 70     | Poxviridae       | <i>Pigeonpox virus</i>                           | GCF_000922075.1           | 70        |
| 71     | Poxviridae       | <i>Turkeypox virus</i>                           | GCF_001431935.1           | 71        |

|    |            |                                       |                 |    |
|----|------------|---------------------------------------|-----------------|----|
| 72 | Poxviridae | Fowlpox virus                         | GCF_000838605.1 | 72 |
| 73 | Poxviridae | Penquinpox virus                      | GCF_000923135.1 | 70 |
| 74 | Poxviridae | Goatpox virus Pellor                  | GCF_000840165.1 | 73 |
| 75 | Poxviridae | Lumpy skin disease virus NI-2490      | GCF_000839805.1 | 74 |
| 76 | Poxviridae | Sheeppox virus                        | GCF_000840205.1 | 73 |
| 77 | Poxviridae | Yoka poxvirus                         | GCF_000892975.1 | 75 |
| 78 | Poxviridae | Deerpox virus W-848-83                | GCF_000861985.1 | 76 |
| 79 | Poxviridae | Nile crocodilepox virus               | GCF_000869065.1 | 77 |
| 80 | Poxviridae | Myxoma virus                          | GCF_000843685.1 | 78 |
| 81 | Poxviridae | Rabbit fibroma virus                  | GCF_000847965.1 | 79 |
| 82 | Poxviridae | Molluscum contagiosum virus subtype 1 | GCF_000843325.1 | 80 |
| 83 | Poxviridae | Camelpox virus                        | GCF_000839105.1 | 81 |
| 84 | Poxviridae | Cowpox virus                          | GCF_000839185.1 | 82 |
| 85 | Poxviridae | Ectromella virus                      | GCF_000841905.1 | 83 |
| 86 | Poxviridae | Monkeypox virus Zaire-96-I-16         | GCF_000857045.1 | 84 |
| 87 | Poxviridae | Raccoonpox virus                      | GCF_001029045.1 | 85 |
| 88 | Poxviridae | Taterapox virus                       | GCF_000869985.1 | 86 |
| 89 | Poxviridae | Vaccinia virus                        | GCF_000860085.1 | 87 |
| 90 | Poxviridae | Variola virus                         | GCF_000859885.1 | 88 |
| 91 | Poxviridae | Bovine papular stomatitis virus       | GCF_000844045.1 | 89 |
| 92 | Poxviridae | Orf virus                             | GCF_000844845.1 | 89 |
| 93 | Poxviridae | Parapoxvirus red deer/HL953           | GCF_000930695.1 | 90 |
| 94 | Poxviridae | Pseudocowpox virus                    | GCF_000886295.1 | 91 |
| 95 | Poxviridae | Swinepox virus                        | GCF_000839965.1 | 92 |
| 96 | Poxviridae | Yaba monkey tumor virus               | GCF_000845705.1 | 93 |
| 97 | Poxviridae | Yaba-like disease virus               | GCF_000847185.1 | 94 |
| 98 | Poxviridae | Squirrelpox virus                     | GCF_000913615.1 | 95 |
| 99 | Poxviridae | Colla virus SPAv232                   | GCF_000894375.1 | 96 |

Supplementary Table 2. NCLDV protein clusters that contributed to new entries in Pfam 33.1 and 34.0 release.

| pfamA_acc | pfamA_id       | Pfam identifier | Original protein cluster(s)                                                                                                              |
|-----------|----------------|-----------------|------------------------------------------------------------------------------------------------------------------------------------------|
| PF19058   | DUF5754        | PF19058         | cluster_153, cluster_727                                                                                                                 |
| PF19061   | DUF5757        | PF19061         | cluster_154                                                                                                                              |
| PF19062   | DUF5758        | PF19062         | cluster_158                                                                                                                              |
| PF19063   | DUF5759        | PF19063         | cluster_167                                                                                                                              |
| PF19064   | DUF5760        | PF19064         | cluster_168, cluster_1213                                                                                                                |
| PF19065   | DUF5761        | PF19065         | cluster_170                                                                                                                              |
| PF19066   | DUF5762        | PF19066         | cluster_183, cluster_411, cluster_1328                                                                                                   |
| PF19067   | DUF5763        | PF19067         | cluster_186, cluster_358, cluster_851                                                                                                    |
| PF19068   | DUF5764        | PF19068         | cluster_200, cluster_1484                                                                                                                |
| PF19069   | DUF5765        | PF19069         | cluster_201                                                                                                                              |
| PF19070   | DUF5766        | PF19070         | cluster_205                                                                                                                              |
| PF19071   | DUF5767        | PF19071         | cluster_213, cluster_332, cluster_489, cluster_1678, cluster_2757                                                                        |
| PF19072   | DUF5768        | PF19072         | cluster_214                                                                                                                              |
| PF19073   | DUF5769        | PF19073         | cluster_225                                                                                                                              |
| PF19074   | DUF5770        | PF19074         | cluster_230                                                                                                                              |
| PF19075   | DUF5771        | PF19075         | cluster_234                                                                                                                              |
| PF19080   | DUF5772        | PF19080         | cluster_235, cluster_462, cluster_2817                                                                                                   |
| PF19082   | DUF5773        | PF19082         | cluster_250                                                                                                                              |
| PF19083   | DUF5774        | PF19083         | cluster_252                                                                                                                              |
| PF19084   | DUF5775        | PF19084         | cluster_256                                                                                                                              |
| PF19161   | DUF5843        | PF19161         | cluster_400                                                                                                                              |
| PF19162   | DUF5844        | PF19162         | cluster_401                                                                                                                              |
| PF19163   | DUF5845        | PF19163         | cluster_405                                                                                                                              |
| PF19164   | DUF5846        | PF19164         | cluster_431                                                                                                                              |
| PF19165   | DUF5847        | PF19165         | cluster_432, cluster_2662, cluster_2663                                                                                                  |
| PF19166   | DUF5848        | PF19166         | cluster_434, cluster_828, cluster_1584, cluster_1990, cluster_1990, cluster_2110, cluster_2439, cluster_2439, cluster_3144, cluster_3207 |
| PF19167   | DUF5849        | PF19167         | cluster_436, cluster_1137, cluster_2128                                                                                                  |
| PF19168   | DUF5850        | PF19168         | cluster_453, cluster_520, cluster_1937                                                                                                   |
| PF19169   | DUF5851        | PF19169         | cluster_812                                                                                                                              |
| PF19170   | DUF5852        | PF19170         | cluster_1010                                                                                                                             |
| PF19171   | DUF5853        | PF19171         | cluster_979                                                                                                                              |
| PF19172   | DUF5854        | PF19172         | cluster_488                                                                                                                              |
| PF19173   | DUF5855        | PF19173         | cluster_502                                                                                                                              |
| PF19174   | DUF5856        | PF19174         | cluster_515                                                                                                                              |
| PF19175   | DUF5857        | PF19175         | cluster_542                                                                                                                              |
| PF19176   | DUF5858        | PF19176         | cluster_544                                                                                                                              |
| PF19177   | DUF5859        | PF19177         | cluster_591                                                                                                                              |
| PF19178   | DUF5860        | PF19178         | cluster_693, cluster_2194, cluster_2195                                                                                                  |
| PF19179   | DUF5861        | PF19179         | cluster_708, cluster_3167                                                                                                                |
| PF19180   | DUF5862        | PF19180         | cluster_718, cluster_2496, cluster_2917                                                                                                  |
| PF19181   | DUF5863        | PF19181         | cluster_575                                                                                                                              |
| PF19182   | DUF5864        | PF19182         | cluster_547                                                                                                                              |
| PF19183   | DUF5865        | PF19183         | cluster_550, cluster_2104                                                                                                                |
| PF19184   | DUF5866        | PF19184         | cluster_841                                                                                                                              |
| PF19185   | DUF5867        | PF19185         | cluster_719                                                                                                                              |
| PF19186   | DUF5868        | PF19186         | cluster_685                                                                                                                              |
| PF19194   | DUF5869        | PF19194         | cluster_543                                                                                                                              |
| PF19195   | DUF5870        | PF19195         | cluster_870                                                                                                                              |
| PF19196   | DUF5871        | PF19196         | cluster_930                                                                                                                              |
| PF19197   | DUF5872        | PF19197         | cluster_732                                                                                                                              |
| PF19201   | DUF5873        | PF19201         | cluster_538                                                                                                                              |
| PF19202   | DUF5874        | PF19202         | cluster_375, cluster_713                                                                                                                 |
| PF19203   | DUF5875        | PF19203         | cluster_522                                                                                                                              |
| PF19204   | DUF5876        | PF19204         | cluster_519                                                                                                                              |
| PF19205   | DUF5877        | PF19205         | cluster_516                                                                                                                              |
| PF19206   | DUF5878        | PF19206         | cluster_437                                                                                                                              |
| PF19207   | DUF5879        | PF19207         | cluster_696                                                                                                                              |
| PF19208   | DUF5880        | PF19208         | cluster_564                                                                                                                              |
| PF19228   | DUF5881        | PF19228         | cluster_555                                                                                                                              |
| PF19229   | DUF5882        | PF19229         | cluster_487                                                                                                                              |
| PF19230   | DUF5883        | PF19230         | cluster_529                                                                                                                              |
| PF19231   | DUF5884        | PF19231         | cluster_438                                                                                                                              |
| PF19232   | DUF5885        | PF19232         | cluster_1097, cluster_2131                                                                                                               |
| PF19233   | DUF5886        | PF19233         | cluster_1077                                                                                                                             |
| PF19234   | DUF5887        | PF19234         | cluster_1000                                                                                                                             |
| PF19235   | DUF5888        | PF19235         | cluster_535                                                                                                                              |
| PF19237   | DUF5889        | PF19237         | cluster_1080 (was listed twice ?)                                                                                                        |
| PF19239   | GIY_YIG_dom    | PF19239         | cluster_858                                                                                                                              |
| PF19240   | DUF5890        | PF19240         | cluster_222, cluster_1868                                                                                                                |
| PF19241   | DUF5891        | PF19241         | cluster_271                                                                                                                              |
| PF19242   | Zn_finger_prot | PF19242         | cluster_368                                                                                                                              |
| PF19243   | DUF5892        | PF19243         | cluster_792                                                                                                                              |
| PF19244   | Poly_A_pol_ca  | PF19244         | cluster_801                                                                                                                              |
| PF19245   | DUF5893        | PF19245         | cluster_804, cluster_1912                                                                                                                |
| PF19246   | DUF5894        | PF19246         | cluster_813                                                                                                                              |
| PF19247   | DUF5895        | PF19247         | cluster_818                                                                                                                              |
| PF19248   | DUF5896        | PF19248         | cluster_823, cluster_3054                                                                                                                |
| PF19249   | DUF5897        | PF19249         | cluster_554, cluster_828                                                                                                                 |
| PF19250   | DUF5898        | PF19250         | cluster_831                                                                                                                              |
| PF19251   | DUF5899        | PF19251         | cluster_291, cluster_847, cluster_1210, cluster_1465                                                                                     |
| PF19253   | DUF5900        | PF19253         | cluster_871, cluster_1177, cluster_2155                                                                                                  |
| PF19254   | DUF5901        | PF19254         | cluster_952                                                                                                                              |
| PF19255   | DUF5902        | PF19255         | cluster_185, cluster_417                                                                                                                 |
| PF19260   | DUF5903        | PF19260         | cluster_308                                                                                                                              |
| PF19261   | DUF5904        | PF19261         | cluster_390                                                                                                                              |
| PF19262   | DUF5905        | PF19262         | cluster_395                                                                                                                              |
| PF19263   | DUF5906        | PF19263         | cluster_1170                                                                                                                             |
| PF19264   | DUF5907        | PF19264         | cluster_136                                                                                                                              |

Supplementary Table S3. ORFs of new NCLDV and their blastp hits to identify protein cluster membership

| Species name                         | Annotated ORFs per genome | Genes receiving a significant BLASTp hit (hit above HSSP curve <sup>97</sup> threshold) | Percentage of the ORFs receiving a blast hit | Number of protein clusters | Number of ORFs hitting singletons |
|--------------------------------------|---------------------------|-----------------------------------------------------------------------------------------|----------------------------------------------|----------------------------|-----------------------------------|
| Acanthamoeba castellanii medusavirus | 890                       | 220                                                                                     | 0.25                                         | 88                         | 30                                |
| Faustovirus                          | 496                       | 99                                                                                      | 0.20                                         | 59                         | 18                                |
| Tupanvirus deep ocean                | 1276                      | 726                                                                                     | 0.57                                         | 463                        | 69                                |
| Yaravirus brasiliensis               | 74                        | 5                                                                                       | 0.07                                         | 4                          | 0                                 |

Supplementary Table S4. The 26 widest distributed protein clusters among NCLDVs.

| Order number for the widest distributed protein clusters | Cluster identifier in the dataset | Pfam*                                                                                                                                 | Pfam annotations                                                                                                                                                                                                                                                                                                                                                                                                                         | Corresponding protein families in Yutin et al. 2009 Virol. J. 6:223**                                                                                                                                                                                                                                                                                                                                                                                                                                                                                                                                                                                                                                                                                                                                                                                                                                                                                                                                                                                                                                                                                                                                                                                                                                           | Description                                                                                                                                                                                                                                                                                                                                                                         |
|----------------------------------------------------------|-----------------------------------|---------------------------------------------------------------------------------------------------------------------------------------|------------------------------------------------------------------------------------------------------------------------------------------------------------------------------------------------------------------------------------------------------------------------------------------------------------------------------------------------------------------------------------------------------------------------------------------|-----------------------------------------------------------------------------------------------------------------------------------------------------------------------------------------------------------------------------------------------------------------------------------------------------------------------------------------------------------------------------------------------------------------------------------------------------------------------------------------------------------------------------------------------------------------------------------------------------------------------------------------------------------------------------------------------------------------------------------------------------------------------------------------------------------------------------------------------------------------------------------------------------------------------------------------------------------------------------------------------------------------------------------------------------------------------------------------------------------------------------------------------------------------------------------------------------------------------------------------------------------------------------------------------------------------|-------------------------------------------------------------------------------------------------------------------------------------------------------------------------------------------------------------------------------------------------------------------------------------------------------------------------------------------------------------------------------------|
| 1                                                        | cluster_11                        | PF04947, PF08792, PF17026                                                                                                             | A2L zinc ribbon domain, Poxvirus Late Transcription Factor VLTf3 like, Putative ribonucleoprotein zinc-finger pf C4 type                                                                                                                                                                                                                                                                                                                 | NCVOG0262                                                                                                                                                                                                                                                                                                                                                                                                                                                                                                                                                                                                                                                                                                                                                                                                                                                                                                                                                                                                                                                                                                                                                                                                                                                                                                       | Poxvirus Late Transcription Factor VLTf3 like                                                                                                                                                                                                                                                                                                                                       |
| 2                                                        | cluster_9                         | PF04665, PF13401                                                                                                                      | AAA domain, Poxvirus A32 protein                                                                                                                                                                                                                                                                                                                                                                                                         | NCVOG0079, NCVOG0249                                                                                                                                                                                                                                                                                                                                                                                                                                                                                                                                                                                                                                                                                                                                                                                                                                                                                                                                                                                                                                                                                                                                                                                                                                                                                            | packaging ATPase, putative ATPase                                                                                                                                                                                                                                                                                                                                                   |
| 3                                                        | cluster_3                         | PF00176, PF02070, PF00271, PF04951, PF06203, PF05204, PF08148, PF08489, PF10544, PF12011, PF13639, PF13920, PF14634, PF14890, PF16124 | DEAD/IDEAH box helicase, D5HCT (NUC185) domain, Domain of unknown function (DUF3520), Helicase conserved C-terminal domain, Homi, end-associated Heli, Homing endonuclease, Intein splicing domain, Nucleoside triphosphatase C-terminal, RecQ zinc-binding, Ring finger domain, SNF2 family N-terminal domain, Tsofl12 domain, Type III restriction enzyme, res subunit, Zinc finger, C3HC4 type (RING finger), zinc-RING finger domain | NCVOG0025, NCVOG0027, NCVOG0029, NCVOG0030, NCVOG0031, NCVOG0032, NCVOG0076, NCVOG0199, NCVOG0214, NCVOG0267, NCVOG0330, NCVOG1100, NCVOG5431                                                                                                                                                                                                                                                                                                                                                                                                                                                                                                                                                                                                                                                                                                                                                                                                                                                                                                                                                                                                                                                                                                                                                                   | DEAD-like helicases superfamily, DEAD/SNF2-like helicase, DNA or RNA helicases of superfamily II, NTPase/helicase, RING-finger-containing E3 ubiquitin ligase, RNA-helicase DEH-NPH-II, superfamily II helicase, uncharacterized protein, unclassified DEAD/SNF2-like helicases                                                                                                     |
| 4                                                        | cluster_12                        | PF00136, PF08037, PF03104, PF08408, PF08452, PF14890                                                                                  | DNA polymerase family B, DNA polymerase family B exonuclease domain, N-terminal, DNA polymerase family B viral insert, DNA polymerase family B, exonuclease domain, Intein splicing domain, SAP domain                                                                                                                                                                                                                                   | NCVOG0038                                                                                                                                                                                                                                                                                                                                                                                                                                                                                                                                                                                                                                                                                                                                                                                                                                                                                                                                                                                                                                                                                                                                                                                                                                                                                                       | DNA polymerase elongation subunit family B                                                                                                                                                                                                                                                                                                                                          |
| 5                                                        | cluster_4                         | PF00069, PF00134, PF05445, PF07714, PF08793, PF13458                                                                                  | 2-cysteine adaptor domain, Cyclin, N-terminal domain, Periplasmic binding protein, Poxvirus serine/threonine protein kinase, Protein kinase domain, Protein tyrosine kinase                                                                                                                                                                                                                                                              | NCVOG0282, NCVOG0284, NCVOG0288, NCVOG0295, NCVOG0297, NCVOG3001, NCVOG3002, NCVOG3004, NCVOG3005, NCVOG0424, NCVOG1356, NCVOG4292                                                                                                                                                                                                                                                                                                                                                                                                                                                                                                                                                                                                                                                                                                                                                                                                                                                                                                                                                                                                                                                                                                                                                                              | 2-cysteine adaptor domain (pfam08793). The virus-specific domain is found fused to OTU/A20-like peptidases and S/T protein kinases, F10-like kinase, Serine/Threonine or Tyrosine protein kinase ( tandem-duplicated in Mimivirus and Marselleviridae), Serine/Threonine protein kinase, Serine/Threonine protein kinases, serine/threonine protein kinase, uncharacterized protein |
| 6                                                        | cluster_13                        | PF04777, PF04805, PF10403                                                                                                             | E10-like protein conserved region, Erv1 / Aif family, Rad4 beta-hairpin domain 1                                                                                                                                                                                                                                                                                                                                                         | NCVOG0052, NCVOG4692                                                                                                                                                                                                                                                                                                                                                                                                                                                                                                                                                                                                                                                                                                                                                                                                                                                                                                                                                                                                                                                                                                                                                                                                                                                                                            | ERV1/aifR sulphhydryl oxidase-like protein, disulfide (thio) oxidoreductase, Erv1 / Aif family                                                                                                                                                                                                                                                                                      |
| 7                                                        | cluster_15                        | PF08488, PF09159                                                                                                                      | Mitochondrial resolvase Ydc2 / RNA splicing MRS1, Poxvirus A22 protein                                                                                                                                                                                                                                                                                                                                                                   | NCVOG0278, NCVOG4573                                                                                                                                                                                                                                                                                                                                                                                                                                                                                                                                                                                                                                                                                                                                                                                                                                                                                                                                                                                                                                                                                                                                                                                                                                                                                            | RuvC, Holliday junction resolvases (HJRs), Poxvirus A22 family, uncharacterized protein                                                                                                                                                                                                                                                                                             |
| 8                                                        | cluster_21                        | PF02066, PF00042                                                                                                                      | Glutaredoxin, Ribonucleotide reductase, small chain                                                                                                                                                                                                                                                                                                                                                                                      | NCVOG0276, NCVOG0277, NCVOG0317                                                                                                                                                                                                                                                                                                                                                                                                                                                                                                                                                                                                                                                                                                                                                                                                                                                                                                                                                                                                                                                                                                                                                                                                                                                                                 | Ribonucleotide reductase small subunit, Thioredoxin, ribonucleoside diphosphate reductase, beta subunit                                                                                                                                                                                                                                                                             |
| 9                                                        | cluster_22                        | PF00692                                                                                                                               | dUTPase                                                                                                                                                                                                                                                                                                                                                                                                                                  | NCVOG1068                                                                                                                                                                                                                                                                                                                                                                                                                                                                                                                                                                                                                                                                                                                                                                                                                                                                                                                                                                                                                                                                                                                                                                                                                                                                                                       | dUTPase                                                                                                                                                                                                                                                                                                                                                                             |
| 10                                                       | cluster_24                        | PF00035, PF00636, PF02295, PF14622                                                                                                    | Adenosine deaminase z-alpha domain, Double-stranded RNA binding motif, Ribonuclease III domain, Ribonuclease-III-like                                                                                                                                                                                                                                                                                                                    | NCVOG0039, NCVOG1354                                                                                                                                                                                                                                                                                                                                                                                                                                                                                                                                                                                                                                                                                                                                                                                                                                                                                                                                                                                                                                                                                                                                                                                                                                                                                            | Ribonuclease III, double-stranded RNA binding protein (cd00048; pfam00035)                                                                                                                                                                                                                                                                                                          |
| 11                                                       | cluster_30                        | PF00317, PF02667, PF03477, PF14890                                                                                                    | ATP cone domain, Intein splicing domain, Ribonucleotide reductase, all-alpha domain, Ribonucleotide reductase, barrel domain                                                                                                                                                                                                                                                                                                             | NCVOG1353                                                                                                                                                                                                                                                                                                                                                                                                                                                                                                                                                                                                                                                                                                                                                                                                                                                                                                                                                                                                                                                                                                                                                                                                                                                                                                       | ribonucleoside diphosphate reductase, alpha subunit                                                                                                                                                                                                                                                                                                                                 |
| 12                                                       | cluster_23                        | PF01712, PF02223, PF04275, PF13238                                                                                                    | AAA domain, Deoxyribose kinase, Phosphomalonate kinase, Thymidylate kinase                                                                                                                                                                                                                                                                                                                                                               | NCVOG0320, NCVOG1067, NCVOG4130, NCVOG4200                                                                                                                                                                                                                                                                                                                                                                                                                                                                                                                                                                                                                                                                                                                                                                                                                                                                                                                                                                                                                                                                                                                                                                                                                                                                      | Thymidylate kinase, deoxyribose kinase, deoxyribose kinase monophosphate kinase (dTMP) kinase, putative deoxyribose kinase                                                                                                                                                                                                                                                          |
| 13                                                       | cluster_28                        | PF00782                                                                                                                               | Dual specificity phosphatase, catalytic domain                                                                                                                                                                                                                                                                                                                                                                                           | NCVOG0040                                                                                                                                                                                                                                                                                                                                                                                                                                                                                                                                                                                                                                                                                                                                                                                                                                                                                                                                                                                                                                                                                                                                                                                                                                                                                                       | Dual specificity phosphatases (DSP), Ser/Thr and Tyr protein phosphatases                                                                                                                                                                                                                                                                                                           |
| 14                                                       | cluster_7                         | PF04451, PF16903                                                                                                                      | Large eukaryotic DNA virus major capsid protein, Major capsid protein N-terminus                                                                                                                                                                                                                                                                                                                                                         | NCVOG0022                                                                                                                                                                                                                                                                                                                                                                                                                                                                                                                                                                                                                                                                                                                                                                                                                                                                                                                                                                                                                                                                                                                                                                                                                                                                                                       | NCLDV major capsid protein                                                                                                                                                                                                                                                                                                                                                          |
| 15                                                       | cluster_1                         | PF00023, PF00646, PF03156, PF08072, PF12795, PF12837, PF13006, PF13637, PF13639, PF13857                                              | Ankyrin repeat, Ankyrin repeats (3 copies), Ankyrin repeats (many copies), F-box domain, F-box-like, Multigene family 530 protein, PRANC domain, Ring finger domain                                                                                                                                                                                                                                                                      | NCVOG0801, NCVOG0057, NCVOG0170, NCVOG0171, NCVOG0172, NCVOG0173, NCVOG0174, NCVOG0175, NCVOG0176, NCVOG0177, NCVOG0178, NCVOG0179, NCVOG0244, NCVOG0330, NCVOG0446, NCVOG0447, NCVOG0448, NCVOG0449, NCVOG0450, NCVOG0451, NCVOG0456, NCVOG0497, NCVOG0528, NCVOG0684, NCVOG0689, NCVOG0710, NCVOG0822, NCVOG0826, NCVOG1013, NCVOG1157, NCVOG1393, NCVOG1407, NCVOG0568, NCVOG3443, NCVOG3734, NCVOG2775, NCVOG2860, NCVOG4001, NCVOG4104, NCVOG4108, NCVOG4109, NCVOG4111, NCVOG4112, NCVOG4115, NCVOG4116, NCVOG4118, NCVOG4121, NCVOG4122, NCVOG4123, NCVOG4344, NCVOG4371, NCVOG4372, NCVOG4382, NCVOG4404, NCVOG4412, NCVOG4413, NCVOG4414, NCVOG4416, NCVOG4418, NCVOG4419, NCVOG4420, NCVOG4421, NCVOG4422, NCVOG4423, NCVOG4430, NCVOG4441, NCVOG4444, NCVOG4445, NCVOG4459, NCVOG4463, NCVOG4488, NCVOG4524, NCVOG4579, NCVOG4580, NCVOG4624, NCVOG4629, NCVOG4676, NCVOG4803, NCVOG4844, NCVOG4871, NCVOG5246, NCVOG5256, NCVOG5265, NCVOG5270, NCVOG5272, NCVOG5273, NCVOG5275, NCVOG5278, NCVOG5280, NCVOG5297, NCVOG5299, NCVOG5301, NCVOG5309, NCVOG5317, NCVOG5320, NCVOG5323, NCVOG5324, NCVOG5338, NCVOG5340, NCVOG5341, NCVOG5346, NCVOG5375, NCVOG5381, NCVOG5385, NCVOG5386, NCVOG5388, NCVOG5389, NCVOG5390, NCVOG5392, NCVOG5393, NCVOG5397, NCVOG5401, NCVOG5402, NCVOG5403, NCVOG5404 | F-box domain protein, F-box-containing protein, RING-finger-containing E3 ubiquitin ligase, ankyrin repeat protein, collagen triple helix repeat containing protein, hypothetical protein, similar to ankyrin, uncharacterized protein                                                                                                                                              |
| 16                                                       | cluster_45                        | PF01096, PF07500                                                                                                                      | Transcription factor S-II (TFIIS), Transcription factor S-II (TFIIS), central domain                                                                                                                                                                                                                                                                                                                                                     | NCVOG0272                                                                                                                                                                                                                                                                                                                                                                                                                                                                                                                                                                                                                                                                                                                                                                                                                                                                                                                                                                                                                                                                                                                                                                                                                                                                                                       | Transcription factor S-II (TFIIS)                                                                                                                                                                                                                                                                                                                                                   |
| 17                                                       | cluster_58                        | PF00204, PF00521, PF01751, PF05518, PF16888                                                                                           | C-terminal associated domain of TOPRM, DNA gyrase B, DNA gyrase/topoisomerase IV, subunit A, Histidine kinase-, DNA gyrase B-, and HSP90-like ATPase, Toprim domain                                                                                                                                                                                                                                                                      | NCVOG0037                                                                                                                                                                                                                                                                                                                                                                                                                                                                                                                                                                                                                                                                                                                                                                                                                                                                                                                                                                                                                                                                                                                                                                                                                                                                                                       | DNA topoisomerase II                                                                                                                                                                                                                                                                                                                                                                |
| 18                                                       | cluster_50                        | PF00620, PF04983, PF04990, PF04997, PF04998, PF05000, PF14890                                                                         | Intein splicing domain, RNA polymerase Rpb1, domain 1, RNA polymerase Rpb1, domain 2, RNA polymerase Rpb1, domain 3, RNA polymerase Rpb1, domain 4, RNA polymerase Rpb1, domain 5, RNA polymerase Rpb1, domain 7                                                                                                                                                                                                                         | NCVOG0274                                                                                                                                                                                                                                                                                                                                                                                                                                                                                                                                                                                                                                                                                                                                                                                                                                                                                                                                                                                                                                                                                                                                                                                                                                                                                                       | DNA-directed RNA polymerase subunit alpha                                                                                                                                                                                                                                                                                                                                           |
| 19                                                       | cluster_55                        | PF00562, PF04560, PF04561, PF04563, PF04565, PF04566, PF04567                                                                         | RNA polymerase Rpb2, domain 2, RNA polymerase Rpb2, domain 3, RNA polymerase Rpb2, domain 4, RNA polymerase Rpb2, domain 5, RNA polymerase Rpb2, domain 6, RNA polymerase Rpb2, domain 7, RNA polymerase beta subunit                                                                                                                                                                                                                    | NCVOG0271                                                                                                                                                                                                                                                                                                                                                                                                                                                                                                                                                                                                                                                                                                                                                                                                                                                                                                                                                                                                                                                                                                                                                                                                                                                                                                       | DNA-directed RNA polymerase subunit beta                                                                                                                                                                                                                                                                                                                                            |
| 20                                                       | cluster_37                        | PF00752, PF00867, PF03159                                                                                                             | XPG I-region, XPG N-terminal domain, XRN 5'-3' exonuclease N-terminus                                                                                                                                                                                                                                                                                                                                                                    | NCVOG1045, NCVOG1060                                                                                                                                                                                                                                                                                                                                                                                                                                                                                                                                                                                                                                                                                                                                                                                                                                                                                                                                                                                                                                                                                                                                                                                                                                                                                            | FLAP-like endonuclease XPG, XRN 5'-3' exonuclease                                                                                                                                                                                                                                                                                                                                   |
| 21                                                       | cluster_57                        | PF01734                                                                                                                               | Patatin-like phospholipase                                                                                                                                                                                                                                                                                                                                                                                                               | NCVOG0245                                                                                                                                                                                                                                                                                                                                                                                                                                                                                                                                                                                                                                                                                                                                                                                                                                                                                                                                                                                                                                                                                                                                                                                                                                                                                                       | Patatin phospholipase                                                                                                                                                                                                                                                                                                                                                               |
| 22                                                       | cluster_89                        | PF08706, PF08707                                                                                                                      | D5 N terminal like, Primase C terminal 2 (PriCT-2)                                                                                                                                                                                                                                                                                                                                                                                       | NCVOG0023                                                                                                                                                                                                                                                                                                                                                                                                                                                                                                                                                                                                                                                                                                                                                                                                                                                                                                                                                                                                                                                                                                                                                                                                                                                                                                       | D5-like helicase-primase                                                                                                                                                                                                                                                                                                                                                            |
| 23                                                       | cluster_146                       | PF00075, PF01693                                                                                                                      | Caulimovirus viroprotein, RNase H                                                                                                                                                                                                                                                                                                                                                                                                        | NCVOG1352, NCVOG4654                                                                                                                                                                                                                                                                                                                                                                                                                                                                                                                                                                                                                                                                                                                                                                                                                                                                                                                                                                                                                                                                                                                                                                                                                                                                                            | RNaseH1 eukaryote-like-protein, ribonuclease H                                                                                                                                                                                                                                                                                                                                      |
| 24                                                       | cluster_145                       | PF02889, PF09770, PF13538, PF13604                                                                                                    | AAA domain, Helicase, PIP1-like helicase, UVD-like helicase C-terminal domain                                                                                                                                                                                                                                                                                                                                                            | NCVOG0248                                                                                                                                                                                                                                                                                                                                                                                                                                                                                                                                                                                                                                                                                                                                                                                                                                                                                                                                                                                                                                                                                                                                                                                                                                                                                                       | PIF1 helicase                                                                                                                                                                                                                                                                                                                                                                       |
| 25                                                       | cluster_94                        | PF00069, PF02011, PF07714, PF12849, PF13458                                                                                           | Adenylylate and Guanylylate cyclase catalytic domain, PBP superfamily domain, Periplasmic binding protein, Protein kinase domain, Protein tyrosine kinase                                                                                                                                                                                                                                                                                | NCVOG0295, NCVOG0305, NCVOG0307                                                                                                                                                                                                                                                                                                                                                                                                                                                                                                                                                                                                                                                                                                                                                                                                                                                                                                                                                                                                                                                                                                                                                                                                                                                                                 | F10-like kinase, Serine/Threonine or Tyrosine protein kinase ( tandem-duplicated in Mimivirus and Marselleviridae), tyrosine protein kinase                                                                                                                                                                                                                                         |
| 26                                                       | cluster_179                       | PF00240                                                                                                                               | Ubiquitin family                                                                                                                                                                                                                                                                                                                                                                                                                         | NCVOG0333                                                                                                                                                                                                                                                                                                                                                                                                                                                                                                                                                                                                                                                                                                                                                                                                                                                                                                                                                                                                                                                                                                                                                                                                                                                                                                       | Ubiquitin                                                                                                                                                                                                                                                                                                                                                                           |

\*Identifier of the protein cluster in this study

\*\*Pfam annotations are based on InterProScan\*\* annotations with default parameters. All the Pfam annotations for protein family members are shown.

\*\*\*The protein family identifiers based on Yutin et al 2009\*\*. Protein families are given only for those proteins that were included to the study Yutin et al. 2009.



Supplementary Table S5. Protein included in the phylogenies following contaminant screen for eukaryote protein and their scaffolds that form individual branches in the phylogenetic trees for cluster 11, cluster 9, cluster 13 and cluster 15.

| The order number for the widest distributed protein clusters among NCLDVs | Supplementary Figure | Cluster identifier in the dataset | Protein id     | Species name                      | Scaffold       | Size (bp) | Number of ORFs in the same scaffold | Proportion of eukaryotic proteins (eukaryotic hits/ (cellular + viral hits)) | Eukaryotic hits | Bacterial hits | Archaeal hits | Viral hits | No hit |
|---------------------------------------------------------------------------|----------------------|-----------------------------------|----------------|-----------------------------------|----------------|-----------|-------------------------------------|------------------------------------------------------------------------------|-----------------|----------------|---------------|------------|--------|
| 1                                                                         | S3                   | Cluster_11                        | CBN80403.1     | <i>Ectocarpus siliculosus</i>     | FN649741.1     | 8064047   | 1840                                | 61.56                                                                        | 1134            | 50             | 0             | 340        | 316    |
| 1                                                                         | S3                   | Cluster_11                        | GAQ85075.1     | <i>Klebsormidium nitens</i>       | DF237168.1     | 1377706   | 201                                 | 80.6                                                                         | 162             | 0              | 0             | 6          | 33     |
| 1                                                                         | S3                   | Cluster_11                        | GAQ90999.1     | <i>Klebsormidium nitens</i>       | DF237661.1     | 47014     | 36                                  | 83.33                                                                        | 30              | 0              | 0             | 2          | 4      |
| 1                                                                         | S3                   | Cluster_11                        | GAQ92093.1     | <i>Klebsormidium nitens</i>       | DF237869.1     | 29316     | 24                                  | 66.67                                                                        | 16              | 0              | 0             | 0          | 8      |
| 1                                                                         | S3                   | Cluster_11                        | GAQ93349.1     | <i>Klebsormidium nitens</i>       | DF238410.1     | 5700      | 3                                   | 66.67                                                                        | 2               | 0              | 0             | 0          | 1      |
| 1                                                                         | S3                   | Cluster_11                        | KX51414.1      | <i>Gonapodya prolifera</i> JEL478 | KF965771.1     | 357412    | 152                                 | 65.79                                                                        | 100             | 4              | 0             | 1          | 47     |
| 1                                                                         | S3                   | Cluster_11                        | XP_004205627.1 | <i>Hydra vulgaris</i>             | NW_004166914.1 | 395687    | 22                                  | 27.27                                                                        | 6               | 4              | 0             | 8          | 4      |
| 1                                                                         | S3                   | Cluster_11                        | XP_005836760.1 | <i>Guillardia theta</i> CCMP2712  | NW_005434657.1 | 1003429   | 562                                 | 66.08                                                                        | 374             | 18             | 2             | 2          | 166    |
| 2                                                                         | S4                   | Cluster_9                         | CBN80334.1     | <i>Ectocarpus siliculosus</i>     | FN649741.1     | 8064047   | 1840                                | 61.56                                                                        | 1134            | 50             | 0             | 340        | 316    |
| 2                                                                         | S4                   | Cluster_9                         | ET003050.1     | <i>Reticulomyxa filosa</i>        | ASPP01034267.1 | 9090      | 5                                   | 80                                                                           | 4               | 0              | 0             | 0          | 1      |
| 2                                                                         | S4                   | Cluster_9                         | GAQ85072.1     | <i>Klebsormidium nitens</i>       | DF237168.1     | 1377706   | 201                                 | 80.6                                                                         | 162             | 0              | 0             | 6          | 33     |
| 2                                                                         | S4                   | Cluster_9                         | GAQ90578.1     | <i>Klebsormidium nitens</i>       | DF237607.1     | 50556     | 15                                  | 86.67                                                                        | 13              | 0              | 0             | 0          | 2      |
| 2                                                                         | S4                   | Cluster_9                         | GAQ91460.1     | <i>Klebsormidium nitens</i>       | DF237738.1     | 32734     | 12                                  | 75                                                                           | 9               | 0              | 0             | 0          | 3      |
| 2                                                                         | S4                   | Cluster_9                         | GAQ91699.1     | <i>Klebsormidium nitens</i>       | DF237785.1     | 30433     | 11                                  | 54.55                                                                        | 6               | 0              | 0             | 0          | 5      |
| 2                                                                         | S4                   | Cluster_9                         | GAQ91766.1     | <i>Klebsormidium nitens</i>       | DF237797.1     | 28847     | 8                                   | 37.5                                                                         | 3               | 0              | 0             | 0          | 5      |
| 2                                                                         | S4                   | Cluster_9                         | XP_014157608.1 | <i>Sphaeroforma arcica</i> JP610  | NW_014040339.1 | 112087    | 17                                  | 70.59                                                                        | 12              | 0              | 0             | 1          | 4      |
| 6                                                                         | S6                   | Cluster_13                        | XP_005702698.1 | <i>Galdieria sulphuraria</i>      | NW_005178373.1 | 10166     | 7                                   | 14.29                                                                        | 1               | 1              | 0             | 2          | 3      |
| 7                                                                         | S7                   | Cluster_15                        | CBN80409.1     | <i>Ectocarpus siliculosus</i>     | FN649741.1     | 8064047   | 1840                                | 61.56                                                                        | 1134            | 50             | 0             | 340        | 316    |
| 7                                                                         | S7                   | Cluster_15                        | GAQ85074.1     | <i>Klebsormidium nitens</i>       | DF237168.1     | 1377706   | 201                                 | 80.6                                                                         | 162             | 0              | 0             | 6          | 33     |
| 7                                                                         | S7                   | Cluster_15                        | GAQ87941.1     | <i>Klebsormidium nitens</i>       | DF237338.1     | 89163     | 32                                  | 78.12                                                                        | 25              | 0              | 0             | 1          | 6      |
| 7                                                                         | S7                   | Cluster_15                        | GAQ89899.1     | <i>Klebsormidium nitens</i>       | DF237535.1     | 55443     | 20                                  | 60                                                                           | 12              | 0              | 0             | 0          | 8      |
| 7                                                                         | S7                   | Cluster_15                        | GAQ90998.1     | <i>Klebsormidium nitens</i>       | DF237661.1     | 47014     | 36                                  | 83.33                                                                        | 30              | 0              | 0             | 2          | 4      |
| 7                                                                         | S7                   | Cluster_15                        | GAQ92094.1     | <i>Klebsormidium nitens</i>       | DF237869.1     | 29316     | 24                                  | 66.67                                                                        | 16              | 0              | 0             | 0          | 8      |

**Supplementary Table 6A. Most widely shared annotated protein clusters that are unique to NCLDVs**

| Number of NCLDV families that have the cluster | Number of NCLDV species that have a protein family member <sup>a</sup> | Protein cluster | Pfam id <sup>103</sup> | Pfam annotation (and function)                                                                                                                                              |
|------------------------------------------------|------------------------------------------------------------------------|-----------------|------------------------|-----------------------------------------------------------------------------------------------------------------------------------------------------------------------------|
| 4                                              | 47                                                                     | cluster_16      | PF02442                | Lipid membrane protein of large eukaryotic DNA viruses                                                                                                                      |
| 2                                              | 43                                                                     | cluster_53      | PF03292                | Poxvirus P4B major core protein                                                                                                                                             |
| 2                                              | 42                                                                     | cluster_47      | PF03003                | Pox virus entry-fusion-complex G9/A16                                                                                                                                       |
| 1                                              | 39                                                                     | cluster_64      | PF03410                | Metallopeptidase from vaccinia pox                                                                                                                                          |
| 1                                              | 39                                                                     | cluster_65      | PF03293                | Poxvirus DNA-directed RNA polymerase, 18 kD subunit                                                                                                                         |
| 1                                              | 39                                                                     | cluster_66      | PF03296                | Poxvirus poly(A) polymerase nucleotidyltransferase domain                                                                                                                   |
| 1                                              | 39                                                                     | cluster_70      | PF05323                | Poxvirus A21 Protein (Envelope protein part of the entry-fusion complex responsible for the virus membrane fusion with host cell membrane during virus entry) <sup>98</sup> |
| 1                                              | 39                                                                     | cluster_73      | PF04441                | Poxvirus early transcription factor (VETF), large subunit                                                                                                                   |
| 1                                              | 39                                                                     | cluster_74      | PF03340                | Poxvirus rifampicin resistance protein, Essential for replication <sup>100</sup>                                                                                            |
| 1                                              | 39                                                                     | cluster_75      | PF04584                | Poxvirus A28 family; (Virus penetration into host cytoplasm) <sup>101</sup>                                                                                                 |

<sup>a</sup> Annotated using Interproscan<sup>10</sup> against Pfam (v29.0) database<sup>102</sup>

**Supplementary Table 6B. Proportion of annotated NCLDV specific protein clusters in different NCLDV fa**

| Virus family / genus    | Annotated NCLDV specific protein clusters / Total number of NCLDV specific protein clusters in a virus family / genus (%) |
|-------------------------|---------------------------------------------------------------------------------------------------------------------------|
| <i>Ascoviridae</i>      | 10.91                                                                                                                     |
| <i>Asfarviridae</i>     | 33.33                                                                                                                     |
| <i>Iridoviridae</i>     | 6.54                                                                                                                      |
| <i>Marseilleviridae</i> | 7.17                                                                                                                      |
| <i>Mimiviridae</i>      | 8.06                                                                                                                      |
| <i>Mollivirus</i>       | 4.35                                                                                                                      |
| <i>Pandoravirus</i>     | 5.01                                                                                                                      |
| <i>Phycodnaviridae</i>  | 3.88                                                                                                                      |
| <i>Pithovirus</i>       | 21.74                                                                                                                     |
| <i>Poxviridae</i>       | 32.47                                                                                                                     |

Supplementary Table S7. Protein clusters that are found only among insect-infecting

| Protein cluster             | Virus family or cellular life domain                            | Pfam id                      | Pfam annotation                                                                          | Protein family based on Yutin et al. 2014.* | Protein family annotations based on Yutin et al. 2014.**     |
|-----------------------------|-----------------------------------------------------------------|------------------------------|------------------------------------------------------------------------------------------|---------------------------------------------|--------------------------------------------------------------|
| cluster_164                 | Ascoviridae, Poxviridae                                         | -, PF12678, PF13639, PF13920 | -, RING-H2 zinc finger domain, Ring finger domain, Zinc finger, C3HC4 type (RING finger) | -, NCVOG0330                                | -, RING-finger-containing E3 ubiquitin ligase                |
| cluster_197                 | Ascoviridae, Iridoviridae, Poxviridae                           | -, PF00413                   | -, Matrixin                                                                              | -, NCVOG1120                                | -, metalloproteinase WLM                                     |
| cluster_229                 | Ascoviridae, Baculoviridae, Poxviridae                          | -, PF13930                   | -, DNA/RNA non-specific endonuclease                                                     | -, NCVOG1417                                | -, uncharacterized protein                                   |
| cluster_233                 | Iridoviridae, Poxviridae                                        | PF10544, PF10553             | MSV199 domain, T5orf172 domain                                                           | -, NCVOG1361                                | -, T5orf172 domain                                           |
| cluster_298                 | Ascoviridae, Baculoviridae, Eukaryota, Iridoviridae, Poxviridae | PF00653, PF13920             | Inhibitor of Apoptosis domain, Zinc finger, C3HC4 type (RING finger)                     | -, NCVOG0009, NCVOG4003, NCVOG5020          | -, inhibitor of apoptosis protein, uncharacterized protein   |
| cluster_306                 | Ascoviridae, Iridoviridae                                       | -                            | -                                                                                        | -, NCVOG1086                                | -, uncharacterized protein                                   |
| cluster_355                 | Ascoviridae, Iridoviridae                                       | -                            | -                                                                                        | -, NCVOG4936                                | -, uncharacterized protein                                   |
| cluster_368                 | Ascoviridae, Iridoviridae                                       | -                            | -                                                                                        | -, NCVOG5007                                | -, uncharacterized protein                                   |
| cluster_369                 | Ascoviridae, Iridoviridae                                       | -                            | -                                                                                        | -, NCVOG4921                                | -, uncharacterized protein                                   |
| cluster_388                 | Ascoviridae, Iridoviridae                                       | -                            | -                                                                                        | -, NCVOG1164                                | -, ALL transcription factor/late transcription factor VLTf-2 |
| cluster_389                 | Ascoviridae, Iridoviridae                                       | -                            | -                                                                                        | -, NCVOG0161                                | -, uncharacterized protein                                   |
| cluster_416                 | Baculoviridae, Poxviridae                                       | -                            | -                                                                                        | -, NCVOG0926                                | -, uncharacterized protein                                   |
| cluster_423                 | Baculoviridae, Poxviridae                                       | -                            | -                                                                                        | -, NCVOG5229                                | -, uncharacterized protein                                   |
| cluster_430                 | Baculoviridae, Poxviridae                                       | -, PF02331                   | -, Apoptosis preventing protein                                                          | -, NCVOG0135, NCVOG5196                     | -, uncharacterized protein                                   |
| cluster_561                 | Iridoviridae, Poxviridae                                        | -, PF04973                   | -, Nicotinamide mononucleotide transporter                                               | -, NCVOG4002                                | -, uncharacterized protein                                   |
| cluster_575                 | Ascoviridae, Baculoviridae, Iridoviridae                        | -                            | -                                                                                        | -, NCVOG4380                                | -, uncharacterized protein                                   |
| cluster_587                 | Ascoviridae, Baculoviridae                                      | -, PF07282                   | -, Putative transposase DNA-binding domain                                               | NCVOG0327                                   | uncharacterized protein                                      |
| cluster_661                 | Ascoviridae, Baculoviridae                                      | -, PF02498                   | -, BRO family, N-terminal domain                                                         | NCVOG0010, NCVOG5016                        | BRO-like protein, uncharacterized protein                    |
| cluster_665                 | Baculoviridae, Iridoviridae, Poxviridae                         | -                            | -                                                                                        | -, NCVOG4990                                | -, uncharacterized protein                                   |
| cluster_734                 | Iridoviridae, Poxviridae                                        | PF13489, PF13649, PF13847    | Methyltransferase domain                                                                 | -, NCVOG1191                                | -, SAM dependent methyltransferase                           |
| cluster_780                 | Baculoviridae, Poxviridae                                       | -                            | -                                                                                        | -, NCVOG0106                                | -, uncharacterized protein                                   |
| cluster_783                 | Baculoviridae, Eukaryota, Poxviridae                            | -, PF03067                   | -, Lytic polysaccharide mono-oxygenase, cellulose-degrading                              | -, NCVOG4996                                | -, fusolin                                                   |
| cluster_818                 | Ascoviridae, Iridoviridae                                       | -                            | -                                                                                        | -, NCVOG1085                                | -, uncharacterized protein                                   |
| cluster_822                 | Ascoviridae, Iridoviridae                                       | -                            | -                                                                                        | -, NCVOG1052                                | -, uncharacterized protein                                   |
| cluster_993                 | Baculoviridae, Poxviridae                                       | PF08087                      | Conotoxin O-superfamily                                                                  | -, NCVOG4952                                | -, conotoxin-like protein                                    |
| cluster_1000                | Baculoviridae, Poxviridae                                       | -                            | -                                                                                        | -, NCVOG5224                                | -, uncharacterized protein                                   |
| cluster_1116                | Ascoviridae, Baculoviridae, Eukaryota, Poxviridae               | PF13920                      | Zinc finger, C3HC4 type (RING finger)                                                    | -, NCVOG4379, NCVOG4944, NCVOG4947          | -, uncharacterized protein                                   |
| cluster_1242                | Baculoviridae, Poxviridae                                       | -                            | -                                                                                        | -                                           | -                                                            |
| cluster_1423                | Iridoviridae, Poxviridae                                        | -                            | -                                                                                        | -                                           | -                                                            |
| cluster_1451                | Ascoviridae, Polydnaviridae                                     | -                            | -                                                                                        | NCVOG1054                                   | uncharacterized protein                                      |
| cluster_1452                | Ascoviridae, Baculoviridae, Iridoviridae                        | -                            | -                                                                                        | -, NCVOG0119                                | -, uncharacterized protein                                   |
| cluster_1561                | Ascoviridae, Iridoviridae                                       | -, PF08707, PF09250          | -, Bifunctional DNA primase/polymerase, N-terminal, Primase C terminal 2 (PriCT-2)       | -                                           | -                                                            |
| cluster_1849                | Bacteria, Baculoviridae, Iridoviridae                           | PF10544                      | T5orf172 domain                                                                          | -, NCVOG1361                                | -, T5orf172 domain                                           |
| cluster_1851                | Ascoviridae, Iridoviridae                                       | -, PF14608                   | -, RNA-binding, Nab2-type zinc finger                                                    | -                                           | -                                                            |
| cluster_1887                | Ascoviridae, Baculoviridae                                      | -                            | -                                                                                        | NCVOG0160                                   | uncharacterized protein                                      |
| cluster_2302                | Ascoviridae, Iridoviridae                                       | -                            | -                                                                                        | -                                           | -                                                            |
| cluster_2309                | Baculoviridae, Poxviridae                                       | -, PF13639, PF13920          | -, Ring finger domain, Zinc finger, C3HC4 type (RING finger)                             | -                                           | -                                                            |
| cluster_2383                | Ascoviridae, Baculoviridae                                      | -, PF00656                   | -, Caspase domain                                                                        | NCVOG1053                                   | caspase-like protein                                         |
| cluster_2808                | Baculoviridae, Poxviridae                                       | PF09414                      | RNA ligase                                                                               | NCVOG5235                                   | uncharacterized protein                                      |
| cluster_2811                | Ascoviridae, Poxviridae                                         | PF10488                      | Phosphatase-1 catalytic subunit binding region                                           | NCVOG0965                                   | -, RNA ligase (conserved in insect and vertebrate viruses)   |
| cluster_2820                | Ascoviridae, Baculoviridae, Iridoviridae                        | PF09511                      | RNA ligase                                                                               | -, NCVOG1088                                | -                                                            |
| cluster_2963                | Ascoviridae, Baculoviridae                                      | -, PF10544                   | -, T5orf172 domain                                                                       | NCVOG1361                                   | T5orf172 domain                                              |
| cluster_2978                | Ascoviridae, Baculoviridae                                      | -                            | -                                                                                        | NCVOG5016                                   | uncharacterized protein                                      |
| cluster_2980                | Ascoviridae, Baculoviridae                                      | -                            | -                                                                                        | NCVOG0959                                   | uncharacterized protein                                      |
| cluster_2981                | Ascoviridae, Baculoviridae, Eukaryota, Poxviridae               | PF13164                      | Protein of unknown function (DUF4002)                                                    | NCVOG0377                                   | uncharacterized protein                                      |
| cluster_2992                | Ascoviridae, Baculoviridae                                      | PF13639                      | Ring finger domain                                                                       | NCVOG0330                                   | RING-finger-containing E3 ubiquitin ligase                   |
| cluster_3007                | Iridoviridae, Poxviridae                                        | -                            | -                                                                                        | NCVOG4928                                   | uncharacterized protein                                      |
| unclassified YP_001110887.1 | Ascoviridae, Baculoviridae                                      | -                            | -                                                                                        | NCVOG0328                                   | uncharacterized protein                                      |
| unclassified YP_001110896.1 | Ascoviridae, Baculoviridae                                      | -                            | -                                                                                        | -                                           | -                                                            |
| unclassified YP_001110941.1 | Ascoviridae, Baculoviridae                                      | -                            | -                                                                                        | -                                           | -                                                            |
| unclassified YP_001110943.1 | Ascoviridae, Baculoviridae                                      | -                            | -                                                                                        | NCVOG0010                                   | BRO-like protein                                             |
| unclassified YP_001110950.1 | Ascoviridae, Baculoviridae                                      | PF02498                      | BRO family, N-terminal domain                                                            | NCVOG0010                                   | BRO-like protein                                             |
| unclassified YP_001110964.1 | Ascoviridae, Baculoviridae                                      | -                            | -                                                                                        | NCVOG0010                                   | BRO-like protein                                             |
| unclassified YP_001110976.1 | Ascoviridae, Baculoviridae                                      | -                            | -                                                                                        | -                                           | -                                                            |
| unclassified YP_001110977.1 | Ascoviridae, Baculoviridae                                      | -                            | -                                                                                        | -                                           | -                                                            |
| unclassified YP_001111014.1 | Ascoviridae, Baculoviridae                                      | PF10544                      | T5orf172 domain                                                                          | NCVOG1361                                   | T5orf172 domain                                              |
| unclassified YP_008003527.1 | Baculoviridae, Poxviridae                                       | -                            | -                                                                                        | -                                           | -                                                            |
| unclassified YP_008003798.1 | Baculoviridae, Poxviridae                                       | -                            | -                                                                                        | NCVOG5235                                   | uncharacterized protein                                      |
| unclassified YP_008003801.1 | Baculoviridae, Poxviridae                                       | PF13930                      | DNA/RNA non-specific endonuclease                                                        | NCVOG1417                                   | uncharacterized protein                                      |
| unclassified YP_008003811.1 | Baculoviridae, Poxviridae                                       | -                            | -                                                                                        | -                                           | -                                                            |
| unclassified YP_008004018.1 | Baculoviridae, Poxviridae                                       | -                            | -                                                                                        | -                                           | -                                                            |
| unclassified YP_762386.1    | Ascoviridae, Baculoviridae                                      | -                            | -                                                                                        | -                                           | -                                                            |
| unclassified YP_762426.1    | Ascoviridae, Baculoviridae                                      | -                            | -                                                                                        | -                                           | -                                                            |
| unclassified YP_762435.1    | Ascoviridae, Baculoviridae                                      | PF02498                      | BRO family, N-terminal domain                                                            | NCVOG0010                                   | BRO-like protein                                             |
| unclassified YP_762476.1    | Ascoviridae, Baculoviridae                                      | PF13164                      | Protein of unknown function (DUF4002)                                                    | -                                           | -                                                            |
| unclassified YP_803313.1    | Ascoviridae, Baculoviridae                                      | -                            | -                                                                                        | -                                           | -                                                            |
| unclassified YP_803353.1    | Ascoviridae, Baculoviridae                                      | -                            | -                                                                                        | -                                           | -                                                            |

Supplementary Table S8. Protein clusters that are found only from vertebrate-infecting viruses (present at least in two virus families).

| Protein cluster             | Virus family or cellular life domain        | Pfam id     | Pfam annotation                       | Protein family based on Yutin et al. 2014. | Protein family annotations based on Yutin et al. 2014. |
|-----------------------------|---------------------------------------------|-------------|---------------------------------------|--------------------------------------------|--------------------------------------------------------|
| cluster_486                 | Herpesviridae, Poxviridae                   | PF12906     | RING-variant domain                   | - , NCVOG1394                              | - , uncharacterized protein                            |
| cluster_675                 | Iridoviridae, Poxviridae                    | PF00341     | PDGFVEGF domain                       | - , NCVOG423                               | - , vascular endothelial growth factor-like protein    |
| cluster_758                 | Herpesviridae, Poxviridae                   | -           | -                                     | - , NCVOG0885                              | - , uncharacterized protein                            |
| cluster_1573                | Eukaryota, Herpesviridae, Poxviridae        | - , PF00059 | - , Lectin C-type domain              | -                                          | -                                                      |
| cluster_1710                | Herpesviridae, Poxviridae                   | -           | -                                     | - , NCVOG0309                              | - , semaphorin-like protein                            |
| cluster_1844                | Iridoviridae, Poxviridae                    | -           | -                                     | -                                          | -                                                      |
| cluster_1865                | Iridoviridae, Poxviridae                    | PF01027     | Inhibitor of apoptosis-promoting Bax1 | -                                          | -                                                      |
| cluster_2914                | Alloherpesviridae, Iridoviridae, Poxviridae | PF13168     | Poxvirus B22R protein C-terminal      | -                                          | -                                                      |
| cluster_3081                | Iridoviridae, Poxviridae                    | -           | -                                     | - , NCVOG1196                              | - , uncharacterized protein                            |
| unclassified YP_009162534.1 | Alloherpesviridae, Poxviridae               | PF13168     | Poxvirus B22R protein C-terminal      | -                                          | -                                                      |
| unclassified YP_784345.1    | Alloherpesviridae, Poxviridae               | -           | -                                     | -                                          | -                                                      |

Supplementary Table S9. Protein clusters that are shared with phages.

| Protein cluster             | Virus family or cellular life domain                                                                                                                                                 | Pfam id                                                                                                                               | Pfam annotation                                                                                                                                                                                                                                                                                                                                                                                                                           | Protein family based on Yutin et al. 2014.                                                                                                                                                                                 | Protein family annotations based on Yutin et al. 2014.                                                                                                                                                                                                                                                                                                                                                                                                      |
|-----------------------------|--------------------------------------------------------------------------------------------------------------------------------------------------------------------------------------|---------------------------------------------------------------------------------------------------------------------------------------|-------------------------------------------------------------------------------------------------------------------------------------------------------------------------------------------------------------------------------------------------------------------------------------------------------------------------------------------------------------------------------------------------------------------------------------------|----------------------------------------------------------------------------------------------------------------------------------------------------------------------------------------------------------------------------|-------------------------------------------------------------------------------------------------------------------------------------------------------------------------------------------------------------------------------------------------------------------------------------------------------------------------------------------------------------------------------------------------------------------------------------------------------------|
| cluster_2                   | Ascoviridae, Bacteria, Baculoviridae, Eukaryota, Iridoviridae, Mimiviridae, Poxviridae, Siphoviridae                                                                                 | PF01541, PF02498, PF02796, PF03288, PF04218, PF04383, PF04480, PF10544, PF10553, PF12299, PF13639                                     | BR0 family, N-terminal domain, CENP-B N-terminal DNA-binding domain, G1Y-YIG catalytic domain, Helix-turn-helix domain of resolvase, KIA-N domain, MSV199 domain, Poxvirus D5 protein-like, Protein of unknown function (DUF3627), Protein of unknown function (DUF559), Ring finger domain, T5orf172 domain                                                                                                                              | NCVOG0010, NCVOG0230, NCVOG1360, NCVOG1361, NCVOG1364, NCVOG1386, NCVOG1424, NCVOG5210, NCVOG5406, NCVOG5420, NCVOG5421, NCVOG5424, NCVOG5426, NCVOG5427, NCVOG5428, NCVOG5429, NCVOG5430, NCVOG5433, NCVOG5435, NCVOG5436 | ALI motif family protein, ALI motif gene family protein, BRO-N domain protein, BRO-like protein, KIA-N domain protein, KIA domain (pfam04383), KIA-N domain protein, MTG motif gene family protein, T5orf172 domain, putative RING finger host range protein, uncharacterized domain DUF3627 found downstream KIA, BRO, and MSV199 domains. Also is found in some baculoviruses (g1 165969059, 18138388), uncharacterized protein, zinc finger-like protein |
| cluster_3                   | Archaea, Ascoviridae, Asfarviridae, Bacteria, Eukaryota, Iridoviridae, Marselleviridae, Mimiviridae, Mollivirus, Pandoravirus, Phycodnaviridae, Pithovirus, Poxviridae, Siphoviridae | PF00176, PF00270, PF00271, PF04851, PF05203, PF05204, PF08148, PF08469, PF10544, PF12011, PF13639, PF13920, PF14634, PF14890, PF16124 | DEAD/DEAH box helicase, DSHCT (NUC185) domain, Domain of unknown function (DUF3503), Helicase conserved C-terminal domain, Hem, end-associated Hint, Homing endonuclease, Intein splicing domain, Nucleoside triphosphatase I C-terminal, RecQ zinc-binding, Ring finger domain, SNF2 family N-terminal domain, T5orf172 domain, Type III restriction enzyme, res subunit, Zinc finger, C3HC4 type (RING finger), zinc-RING finger domain | NCVOG0025, NCVOG0027, NCVOG0029, NCVOG0030, NCVOG0031, NCVOG0032, NCVOG0076, NCVOG0199, NCVOG0214, NCVOG0330, NCVOG1100, NCVOG5431                                                                                         | DEAD-like helicases superfamily, DEAD/SNF2-like helicase, DNA or RNA helicases of superfamily II, NTPase/helicase, RING-finger-containing E3 ubiquitin ligase, RNA-helicase DEH-NPH-II, superfamily II helicase, uncharacterized protein, unclassified DEAD/SNF2-like helicases                                                                                                                                                                             |
| cluster_19                  | Archaea, Bacteria, Eukaryota, Iridoviridae, Mimiviridae, Myoviridae, Phycodnaviridae, Poxviridae, Siphoviridae                                                                       | PF00908, PF01073, PF01370, PF02719, PF04321, PF16363                                                                                  | 3-beta hydroxysteroid dehydrogenase/isomerase family, GDP-mannose 4,6 dehydratase, NAD dependent epimerase/dehydratase family, Polysaccharide biosynthesis protein, RmiD substrate binding domain, dTDP-4-dehydroammonio 3,5-epimerase                                                                                                                                                                                                    | NCVOG1049                                                                                                                                                                                                                  | short chain dehydrogenase                                                                                                                                                                                                                                                                                                                                                                                                                                   |
| cluster_23                  | Ascoviridae, Asfarviridae, Bacteria, Eukaryota, Iridoviridae, Marselleviridae, Mimiviridae, Myoviridae, Phycodnaviridae, Pithovirus, Poxviridae                                      | PF01712, PF02223, PF04275, PF13238                                                                                                    | AAA domain, Deoxynucleoside kinase, Phosphomevalonate kinase, Thymidylate kinase                                                                                                                                                                                                                                                                                                                                                          | NCVOG0320, NCVOG1067, NCVOG4130, NCVOG4200                                                                                                                                                                                 | Thymidylate kinase, deoxynucleoside kinase, deoxynucleotide monophosphate kinase (dNMP) kinase, putative deoxynucleoside kinase                                                                                                                                                                                                                                                                                                                             |
| cluster_27                  | Bacteria, Eukaryota, Marselleviridae, Myoviridae, Pandoravirus, Phycodnaviridae, Siphoviridae, unclassified phages                                                                   | PF01541, PF07453, PF07460                                                                                                             | G1Y-YIG catalytic domain, NUMOD1 domain, NUMOD3 motif (2 copies)                                                                                                                                                                                                                                                                                                                                                                          | NCVOG0062, NCVOG1046                                                                                                                                                                                                       | G1Y-YIG-like endonuclease, Zn-finger protein                                                                                                                                                                                                                                                                                                                                                                                                                |
| cluster_30                  | Ascoviridae, Asfarviridae, Bacteria, Eukaryota, Iridoviridae, Marselleviridae, Mimiviridae, Pandoravirus, Phycodnaviridae, Pithovirus, Podoviridae, Poxviridae, Siphoviridae         | PF00317, PF02867, PF03477, PF14890                                                                                                    | ATP cone domain, Intein splicing domain, Ribonucleotide reductase, all-alpha domain, Ribonucleotide reductase, barrel domain                                                                                                                                                                                                                                                                                                              | NCVOG1353                                                                                                                                                                                                                  | ribonucleoside diphosphate reductase, alpha subunit                                                                                                                                                                                                                                                                                                                                                                                                         |
| cluster_34                  | Bacteria, Eukaryota, Mimiviridae, Myoviridae, Phycodnaviridae, Poxviridae                                                                                                            | PF01755, PF03213                                                                                                                      | Glycosyltransferase family 25 (LPS biosynthesis protein), Poxvirus P35 protein                                                                                                                                                                                                                                                                                                                                                            | NCVOG0256, NCVOG2945, NCVOG4075                                                                                                                                                                                            | IMV envelope protein p35, glycosyltransferase family protein, uncharacterized protein                                                                                                                                                                                                                                                                                                                                                                       |
| cluster_42                  | Bacteria, Mimiviridae, Myoviridae, Phycodnaviridae                                                                                                                                   | PF13640                                                                                                                               | 2OG-Fe(II) oxygenase superfamily                                                                                                                                                                                                                                                                                                                                                                                                          | NCVOG1166, NCVOG4176, NCVOG5075, NCVOG5166, NCVOG5167                                                                                                                                                                      | 2OG-Fe(II) oxygenase family protein, dioxygenase, uncharacterized protein                                                                                                                                                                                                                                                                                                                                                                                   |
| cluster_46                  | Bacteria, Eukaryota, Marselleviridae, Mimiviridae, Myoviridae, Phycodnaviridae, Podoviridae, Siphoviridae                                                                            | PF07463, PF13392                                                                                                                      | HNH endonuclease, NUMOD4 motif                                                                                                                                                                                                                                                                                                                                                                                                            | NCVOG0072, NCVOG1220, NCVOG1349                                                                                                                                                                                            | HNH endonuclease, uncharacterized protein, uncharacterized protein                                                                                                                                                                                                                                                                                                                                                                                          |
| cluster_127                 | Bacteria, Myoviridae, Phycodnaviridae                                                                                                                                                | -                                                                                                                                     | -                                                                                                                                                                                                                                                                                                                                                                                                                                         | -                                                                                                                                                                                                                          | -                                                                                                                                                                                                                                                                                                                                                                                                                                                           |
| cluster_153                 | Eukaryota, Iridoviridae, Phycodnaviridae, unclassified phages                                                                                                                        | -                                                                                                                                     | -                                                                                                                                                                                                                                                                                                                                                                                                                                         | -                                                                                                                                                                                                                          | -                                                                                                                                                                                                                                                                                                                                                                                                                                                           |
| cluster_164                 | Ascoviridae, Bacteria, Eukaryota, Myoviridae, Poxviridae                                                                                                                             | PF12678, PF13639, PF13920                                                                                                             | RING-H2 zinc finger domain, Ring finger domain, Zinc finger, C3HC4 type (RING finger)                                                                                                                                                                                                                                                                                                                                                     | NCVOG0330, NCVOG0967, NCVOG1064                                                                                                                                                                                            | RING-finger-containing E3 ubiquitin ligase, uncharacterized protein, Cytidine and deoxycytidylate deaminase                                                                                                                                                                                                                                                                                                                                                 |
| cluster_176                 | Bacteria, Eukaryota, Iridoviridae, Myoviridae                                                                                                                                        | PF00383                                                                                                                               | Cytidine and deoxycytidylate deaminase zinc-binding region                                                                                                                                                                                                                                                                                                                                                                                | NCVOG0330, NCVOG0967, NCVOG1064                                                                                                                                                                                            | uncharacterized protein, Cytidine and deoxycytidylate deaminase                                                                                                                                                                                                                                                                                                                                                                                             |
| cluster_188                 | Bacteria, Eukaryota, Mimiviridae, Mollivirus, Phycodnaviridae, Siphoviridae                                                                                                          | PF00383                                                                                                                               | Cytidine and deoxycytidylate deaminase zinc-binding region                                                                                                                                                                                                                                                                                                                                                                                | NCVOG0330, NCVOG0967, NCVOG1064                                                                                                                                                                                            | uncharacterized protein, Cytidine and deoxycytidylate deaminase                                                                                                                                                                                                                                                                                                                                                                                             |
| cluster_210                 | Asfarviridae, Bacteria, Marselleviridae, Myoviridae, Phycodnaviridae, Pithovirus, unclassified phages                                                                                | PF01068, PF14743                                                                                                                      | ATP dependent DNA ligase domain, DNA ligase OB-like domain                                                                                                                                                                                                                                                                                                                                                                                | NCVOG0034, NCVOG1075                                                                                                                                                                                                       | -ATP-dependent DNA ligase                                                                                                                                                                                                                                                                                                                                                                                                                                   |
| cluster_211                 | Bacteria, Eukaryota, Iridoviridae, Marselleviridae, Myoviridae                                                                                                                       | -                                                                                                                                     | -                                                                                                                                                                                                                                                                                                                                                                                                                                         | -                                                                                                                                                                                                                          | -                                                                                                                                                                                                                                                                                                                                                                                                                                                           |
| cluster_223                 | Ascoviridae, Bacteria, Iridoviridae, Marselleviridae, Myoviridae, Pithovirus, unclassified phages                                                                                    | PF00149, PF02511                                                                                                                      | Calcineurin-like phosphoesterase, Thymidylate synthase complementing protein                                                                                                                                                                                                                                                                                                                                                              | NCVOG0308, NCVOG1346                                                                                                                                                                                                       | DNA repair exonuclease, FAD-dependent thymidylate synthase                                                                                                                                                                                                                                                                                                                                                                                                  |
| cluster_240                 | Bacteria, Eukaryota, Phycodnaviridae, Pithovirus, Podoviridae, Siphoviridae                                                                                                          | PF00149, PF02511                                                                                                                      | Calcineurin-like phosphoesterase, Thymidylate synthase complementing protein                                                                                                                                                                                                                                                                                                                                                              | NCVOG0308, NCVOG1346                                                                                                                                                                                                       | DNA repair exonuclease, FAD-dependent thymidylate synthase                                                                                                                                                                                                                                                                                                                                                                                                  |
| cluster_244                 | Ascoviridae, Bacteria, Eukaryota, Iridoviridae, Mimiviridae, Myoviridae, Phycodnaviridae                                                                                             | PF00293                                                                                                                               | NUDX domain                                                                                                                                                                                                                                                                                                                                                                                                                               | NCVOG0238, NCVOG4434, NCVOG4453                                                                                                                                                                                            | Nudix hydrolase (D10 ortholog), putative NUDIX hydrolase                                                                                                                                                                                                                                                                                                                                                                                                    |
| cluster_315                 | Myoviridae, Phycodnaviridae                                                                                                                                                          | -                                                                                                                                     | -                                                                                                                                                                                                                                                                                                                                                                                                                                         | -                                                                                                                                                                                                                          | -                                                                                                                                                                                                                                                                                                                                                                                                                                                           |
| cluster_352                 | Bacteria, Eukaryota, Myoviridae, Phycodnaviridae                                                                                                                                     | PF01041                                                                                                                               | DegT/DnrJ/EryC1/StrS aminotransferase family                                                                                                                                                                                                                                                                                                                                                                                              | NCVOG2191                                                                                                                                                                                                                  | uncharacterized protein                                                                                                                                                                                                                                                                                                                                                                                                                                     |
| cluster_384                 | Eukaryota, Mimiviridae, Pandoravirus, Phycodnaviridae, Siphoviridae                                                                                                                  | -                                                                                                                                     | -                                                                                                                                                                                                                                                                                                                                                                                                                                         | -                                                                                                                                                                                                                          | -                                                                                                                                                                                                                                                                                                                                                                                                                                                           |
| cluster_429                 | Bacteria, Eukaryota, Mimiviridae, Myoviridae                                                                                                                                         | -                                                                                                                                     | -                                                                                                                                                                                                                                                                                                                                                                                                                                         | -                                                                                                                                                                                                                          | -                                                                                                                                                                                                                                                                                                                                                                                                                                                           |
| cluster_515                 | Bacteria, Myoviridae, Phycodnaviridae                                                                                                                                                | -                                                                                                                                     | -                                                                                                                                                                                                                                                                                                                                                                                                                                         | -                                                                                                                                                                                                                          | -                                                                                                                                                                                                                                                                                                                                                                                                                                                           |
| cluster_730                 | Bacteria, Phycodnaviridae, Siphoviridae                                                                                                                                              | PF03013                                                                                                                               | Pyrimidine dimer DNA glycosylase                                                                                                                                                                                                                                                                                                                                                                                                          | NCVOG1291                                                                                                                                                                                                                  | putative endonuclease                                                                                                                                                                                                                                                                                                                                                                                                                                       |
| cluster_873                 | Bacteria, Phycodnaviridae, Siphoviridae                                                                                                                                              | PF13385                                                                                                                               | Concanavalin A-like lectin/galactinases superfamily                                                                                                                                                                                                                                                                                                                                                                                       | -                                                                                                                                                                                                                          | -                                                                                                                                                                                                                                                                                                                                                                                                                                                           |
| cluster_1037                | Myoviridae, Phycodnaviridae                                                                                                                                                          | PF01467                                                                                                                               | Cytidyltransferase-like                                                                                                                                                                                                                                                                                                                                                                                                                   | NCVOG4054                                                                                                                                                                                                                  | uncharacterized protein                                                                                                                                                                                                                                                                                                                                                                                                                                     |
| cluster_1080                | Mimiviridae, Myoviridae                                                                                                                                                              | -                                                                                                                                     | -                                                                                                                                                                                                                                                                                                                                                                                                                                         | NCVOG0737, NCVOG4452                                                                                                                                                                                                       | uncharacterized protein                                                                                                                                                                                                                                                                                                                                                                                                                                     |
| cluster_1086                | Bacteria, Eukaryota, Myoviridae, Phycodnaviridae                                                                                                                                     | PF00565                                                                                                                               | Staphylococcal nuclease homologue                                                                                                                                                                                                                                                                                                                                                                                                         | NCVOG1023                                                                                                                                                                                                                  | uncharacterized protein                                                                                                                                                                                                                                                                                                                                                                                                                                     |
| cluster_1120                | Bacteria, Myoviridae, Phycodnaviridae                                                                                                                                                | PF13759                                                                                                                               | Putative 2OG-Fe(II) oxygenase                                                                                                                                                                                                                                                                                                                                                                                                             | -                                                                                                                                                                                                                          | -                                                                                                                                                                                                                                                                                                                                                                                                                                                           |
| cluster_1256                | Bacteria, Mimiviridae, Myoviridae, Phycodnaviridae                                                                                                                                   | PF02739                                                                                                                               | 5'-3' exonuclease, N-terminal resolvase-like domain                                                                                                                                                                                                                                                                                                                                                                                       | NCVOG2640                                                                                                                                                                                                                  | putative RNaseH                                                                                                                                                                                                                                                                                                                                                                                                                                             |
| cluster_1515                | Bacteria, Myoviridae, Phycodnaviridae                                                                                                                                                | PF13884                                                                                                                               | Chaperone of endosialidase                                                                                                                                                                                                                                                                                                                                                                                                                | NCVOG4129                                                                                                                                                                                                                  | uncharacterized protein                                                                                                                                                                                                                                                                                                                                                                                                                                     |
| cluster_1553                | Myoviridae, Phycodnaviridae                                                                                                                                                          | -                                                                                                                                     | -                                                                                                                                                                                                                                                                                                                                                                                                                                         | -                                                                                                                                                                                                                          | -                                                                                                                                                                                                                                                                                                                                                                                                                                                           |
| cluster_1687                | Bacteria, Mimiviridae, Myoviridae                                                                                                                                                    | PF01503                                                                                                                               | Phosphoribosyl-ATP pyrophosphohydrolase                                                                                                                                                                                                                                                                                                                                                                                                   | NCVOG0640                                                                                                                                                                                                                  | Nucleoside Triphosphate Pyrophosphohydrolase                                                                                                                                                                                                                                                                                                                                                                                                                |
| cluster_1737                | Mimiviridae, Siphoviridae                                                                                                                                                            | PF13392                                                                                                                               | HNH endonuclease                                                                                                                                                                                                                                                                                                                                                                                                                          | NCVOG2487                                                                                                                                                                                                                  | Nuod4 HNH endonuclease                                                                                                                                                                                                                                                                                                                                                                                                                                      |
| cluster_1961                | Bacteria, Eukaryota, Myoviridae, Phycodnaviridae                                                                                                                                     | PF13884                                                                                                                               | Chaperone of endosialidase                                                                                                                                                                                                                                                                                                                                                                                                                | -                                                                                                                                                                                                                          | -                                                                                                                                                                                                                                                                                                                                                                                                                                                           |
| cluster_2475                | Bacteria, Phycodnaviridae, Siphoviridae                                                                                                                                              | PF13385                                                                                                                               | Concanavalin A-like lectin/galactinases superfamily                                                                                                                                                                                                                                                                                                                                                                                       | NCVOG0107, NCVOG3007                                                                                                                                                                                                       | uncharacterized protein, uncharacterized protein                                                                                                                                                                                                                                                                                                                                                                                                            |
| cluster_2532                | Bacteria, Myoviridae, Phycodnaviridae                                                                                                                                                | PF04519                                                                                                                               | Polymer-forming cytoskeletal                                                                                                                                                                                                                                                                                                                                                                                                              | -                                                                                                                                                                                                                          | -                                                                                                                                                                                                                                                                                                                                                                                                                                                           |
| cluster_2587                | Phycodnaviridae, Siphoviridae                                                                                                                                                        | -                                                                                                                                     | -                                                                                                                                                                                                                                                                                                                                                                                                                                         | -                                                                                                                                                                                                                          | -                                                                                                                                                                                                                                                                                                                                                                                                                                                           |
| cluster_2910                | Bacteria, Phycodnaviridae, Siphoviridae                                                                                                                                              | PF04434, PF07659                                                                                                                      | Domain of Unknown Function (DUF1599), SWIM zinc finger                                                                                                                                                                                                                                                                                                                                                                                    | NCVOG3095, NCVOG0072                                                                                                                                                                                                       | uncharacterized protein, HNH endonuclease                                                                                                                                                                                                                                                                                                                                                                                                                   |
| cluster_3056                | Marselleviridae, Myoviridae                                                                                                                                                          | PF13392                                                                                                                               | HNH endonuclease                                                                                                                                                                                                                                                                                                                                                                                                                          | NCVOG0072                                                                                                                                                                                                                  | HNH endonuclease                                                                                                                                                                                                                                                                                                                                                                                                                                            |
| cluster_3369                | Myoviridae, Phycodnaviridae                                                                                                                                                          | -                                                                                                                                     | -                                                                                                                                                                                                                                                                                                                                                                                                                                         | -                                                                                                                                                                                                                          | -                                                                                                                                                                                                                                                                                                                                                                                                                                                           |
| unclassified YP_009172561.1 | Myoviridae, Phycodnaviridae                                                                                                                                                          | PF16778                                                                                                                               | Phage tail assembly chaperone protein                                                                                                                                                                                                                                                                                                                                                                                                     | -                                                                                                                                                                                                                          | -                                                                                                                                                                                                                                                                                                                                                                                                                                                           |
| unclassified YP_009172594.1 | Phycodnaviridae, Podoviridae                                                                                                                                                         | -                                                                                                                                     | -                                                                                                                                                                                                                                                                                                                                                                                                                                         | -                                                                                                                                                                                                                          | -                                                                                                                                                                                                                                                                                                                                                                                                                                                           |
| unclassified YP_004061598.1 | Myoviridae, Phycodnaviridae                                                                                                                                                          | -                                                                                                                                     | -                                                                                                                                                                                                                                                                                                                                                                                                                                         | NCVOG5117                                                                                                                                                                                                                  | uncharacterized protein                                                                                                                                                                                                                                                                                                                                                                                                                                     |
| unclassified NP_149563.1    | Iridoviridae, Podoviridae                                                                                                                                                            | PF00644                                                                                                                               | Poly(ADP-ribose) polymerase catalytic domain                                                                                                                                                                                                                                                                                                                                                                                              | -                                                                                                                                                                                                                          | -                                                                                                                                                                                                                                                                                                                                                                                                                                                           |
| unclassified YP_009174846.1 | Myoviridae, Phycodnaviridae                                                                                                                                                          | PF13640                                                                                                                               | 2OG-Fe(II) oxygenase superfamily                                                                                                                                                                                                                                                                                                                                                                                                          | -                                                                                                                                                                                                                          | -                                                                                                                                                                                                                                                                                                                                                                                                                                                           |
| unclassified YP_009174389.1 | Phycodnaviridae, Podoviridae                                                                                                                                                         | -                                                                                                                                     | -                                                                                                                                                                                                                                                                                                                                                                                                                                         | -                                                                                                                                                                                                                          | -                                                                                                                                                                                                                                                                                                                                                                                                                                                           |
| unclassified YP_009174463.1 | Myoviridae, Phycodnaviridae                                                                                                                                                          | PF13884                                                                                                                               | Chaperone of endosialidase                                                                                                                                                                                                                                                                                                                                                                                                                | -                                                                                                                                                                                                                          | -                                                                                                                                                                                                                                                                                                                                                                                                                                                           |

**Supplementary Table S10. Protein clusters that are shared with virophages.**

| Protein cluster             | Virus family or cellular life domain   | Pfam id          | Pfam annotation                                             | Protein family based on Yutin et al. 2014. | Protein family annotations based on Yutin et al. 2014.       |
|-----------------------------|----------------------------------------|------------------|-------------------------------------------------------------|--------------------------------------------|--------------------------------------------------------------|
| cluster_72                  | Bacteria, Poxviridae, virophages       | PF03288, PF08706 | D5 N-terminal-like, Poxvirus D5 protein-like                | NCVOG0023                                  | D5-like helicase-primase                                     |
| cluster_177                 | Bacteria, Phycodnaviridae, virophages  | -                | -                                                           | NCVOG5074, NCVOG5083, NCVOG5121, NCVOG5165 | uncharacterized protein                                      |
| cluster_674                 | Phycodnaviridae, virophages            | PF01541          | GIY-YIG catalytic domain                                    | NCVOG4163, NCVOG4962                       | GIY-YIG superfamily protein, uncharacterized protein         |
| cluster_732                 | Phycodnaviridae, virophages            | -                | -                                                           | NCVOG1231                                  | uncharacterized protein                                      |
| cluster_968                 | Eukaryota, Phycodnaviridae, virophages | PF06598, PF13884 | Chaperone of endosialidase, Chlorovirus glycoprotein repeat | NCVOG0018, NCVOG1226                       | Chlorovirus glycoprotein repeat, glycoprotein repeat protein |
| cluster_1729                | Mimiviridae, virophages                | -                | -                                                           | NCVOG0680                                  | uncharacterized protein                                      |
| cluster_3006                | Iridoviridae, virophages               | -                | -                                                           | -                                          | -                                                            |
| cluster_3390                | Phycodnaviridae, virophages            | PF13920          | Zinc finger, C3HC4 type (RING finger)                       | -                                          | -                                                            |
| unclassified YP_004894054.1 | Mimiviridae, virophages                | -                | -                                                           | -                                          | -                                                            |

## References for Supplementary Data

1. Li L, Stoeckert J. Jr, Roos DS. OrthoMCL: Identification of ortholog groups for eukaryotic genomes. *Genome Res* 2003; 13: 2178-2189.
2. Sievers F, Wilm A, Dineen DG, Gibson TJ, Karplus K, Li W, Lopez R, McWilliam H, Remmert M, Söding J, Thompson JD, Higgins DG. Fast, scalable generation of high-quality protein multiple sequence alignments using Clustal Omega. *Mol Syst Biol* 2011;7:539
3. Söding J. Protein homology detection by HMM-HMM comparison. *Bioinformatics* 2005; 21: 951–960.
4. Katoh K, Standley DM. MAFFT Multiple Sequence Alignment Software Version 7: Improvements in performance and usability. *Mol Biol Evol* 2013;30:772–780.
5. Capella-Gutierrez S, Silla-Martinez JM, Gabaldon T. trimAl: a tool for automated alignment trimming in large-scale phylogenetic analyses. *Bioinformatics* 2009;25:1972-1973.
6. Le SQ, Gascuel O. An improved general amino acid replacement matrix. *Mol Biol Evol* 2008;25: 1307-1320.
7. Le SQ, Gascuel O, Lartillot N. Empirical profile mixture models for phylogenetic reconstruction. *Bioinformatics* 2008;24:2317-2323.
8. Lartillot N, Philippe H. A Bayesian Mixture model for across-site heterogeneities in the amino-acid replacement process. *Mol Biol Evol* 2004;21:1095-1109.
9. Letunic I, Bork P. Interactive tree of life (iTOL) v3: an online tool for the display and annotation of phylogenetic and other trees. *Nucleic Acids Res* 44:W242-W245.
10. Jones P, Binns D, Chang H-Y, Fraser M, Li W, McAnulla C, McWilliam H, Maslen J, Mitchell A, Nuka G, Pesseat S, Quinn AF, Sangrador-Vegas A, Scheremetjew M, Yong S-Y, Lopez R, Hunter S. InterProScan 5: genome-scale protein function classification. *Bioinformatics* 2014;30:1236–1240.
11. Nguyen L-T, Schmidt HA, von Haeseler A, Minh BQ. IQ-TREE: A fast and effective stochastic algorithm for estimating maximum likelihood phylogenies. *Mol Biol Evol* 2015; 32:268-274.
12. Wang HC, Minh BQ, Susko S, Roger AJ. Modeling site heterogeneity with posterior mean site frequency profiles accelerates accurate phylogenomic estimation. *Syst Biol* 2018;67:216–235.
13. Asgari S, Davis J, Wood D, Wilson P, McGrath A. Sequence and organization of the *Heliothis virescens* ascovirus genome. *J Gen Virol* 2007;88:1120-1132.
14. Bigot Y, Renault S, Nicolas J, Moundras C, Demattei MV, Samain S, Bideshi DK, Federici BA. Symbiotic virus at the evolutionary intersection of three types of large DNA viruses; iridoviruses, ascoviruses, and ichnoviruses. *PLoS ONE* 2009;4:e6397.
15. Wang L, Xue J, Seaborn CP, Arif BM, Cheng XW. Sequence and organization of the *Trichoplusia ni* ascovirus 2c (*Ascoviridae*) genome. *Virology* 2006;354:167-177.
16. Bigot Y, Renault S, Nicolas J, Moundras C, Demattei MV, Samain S, Bideshi DK, Federici BA. Symbiotic virus at the evolutionary intersection of three types of large DNA viruses; iridoviruses, ascoviruses, and ichnoviruses. *PLoS ONE* 2009;4:e6397.

17. Yanez RJ, Rodriguez JM, Nogal ML, Yuste L, Enriquez C, Rodriguez JF, Vinuela E. Analysis of the complete nucleotide sequence of African swine fever virus. *Virology* 1995;208:249-278.
18. Delhon G, Tulman ER, Afonso CL, Lu Z, Becnel JJ, Moser BA, Kutish GF, Rock DL. Genome of invertebrate iridescent virus type 3 (mosquito iridescent virus). *J Virol* 2006;80:8439-8449.
19. Jakob NJ, Muller K, Bahr U, Darai G. Analysis of the first complete DNA sequence of an invertebrate iridovirus: coding strategy of the genome of Chilo iridescent virus. *Virology*, 2009;286:182-196.
20. Piegu B, Guizard S, Yeping T, Cruaud C, Asgari S, Bideshi DK, Federici BA, Bigot Y. Genome sequence of a crustacean iridovirus, IIV31, isolated from the pill bug, *Armadillidium vulgare*. *J Gen Virol* 2014;95:1585-1590.
21. Piegu B, Guizard S, Bideshi D, Spears T, Federici BA, Bigot Y. Unpublished.
22. Piegu B, Guizard S, Spears T, Cruaud C, Couloux A, Bideshi DK, Federici BA, Bigot Y. Complete genome sequence of invertebrate iridescent virus 22 isolated from a blackfly larva. *J Gen Virol* 2013;94:2112-2116.
23. Piegu B, Guizard S, Spears T, Cruaud C, Couloux A, Bideshi DK, Federici BA, Bigot Y. Complete genome sequence of invertebrate iridovirus IIV-25 isolated from a blackfly larva. *Arch Virol* 2013;159:1181-1185.
24. Wong CK, Young VL, Kleffmann T, Ward VK. Genomic and proteomic analysis of invertebrate iridovirus type 9. *J Virol* 2011;85:7900-7911.
25. Tong Y, Zhang J, Huang Y, Li S, Pei G, Zhang Z, Mi Z, An X. Unpublished.
26. Zhang QY, Xiao F, Xie J, Li ZQ, Gui JF. Complete genome sequence of lymphocystis disease virus isolated from China. *J Virol* 2004;78:6982-6994.
27. Tidona CA, Darai G. The complete DNA sequence of lymphocystis disease virus. *Virology* 1997;230:207-216.
28. He JG, Deng M, Weng SP, Li Z, Zhou SY, Long QX, Wang XZ, Chan SM. Complete genome analysis of the mandarin fish infectious spleen and kidney necrosis iridovirus. *Virology* 2001;291:126-239.
29. Jancovich JK, Mao J, Chinchar VG, Wyatt C, Case ST, Kumar S, Valente G, Subramanian S, Davidson EW, Collins JP, Jacobs BL. Genomic sequence of a ranavirus (family *Iridoviridae*) associated with salamander mortalities in North America. *Virology* 2003;316:90-103.
30. Jancovich JK, Bremont M, Touchman JW, Jacobs BL. Evidence for multiple recent host species shifts among the Ranaviruses (family *Iridoviridae*). *J Virol* 2010;84:2636-2647.
31. Mavian C, Lopez-Bueno, A, Fernandez Somalo, M.P, Alcami, A. And Alejo, A. Complete genome sequence of the European sheatfish virus. *J Virol* 2012;86:6365-6366.
32. Tan WG, Barkman TJ, Gregory Chinchar V, Essani, K. Comparative genomic analyses of frog virus 3, type species of the genus *Ranavirus* (family *Iridoviridae*). *Virology* 2003;323:70-84.
33. Song WJ, Qin QW, Qiu J, Huang CH, Wang F, Hew CL. Functional genomics analysis of Singapore grouper iridovirus: complete sequence determination and proteomic analysis. *J Virol* 2020;78:12576-12590.
34. Subramaniam K, Toffan A, Cappelozza E, Steckler NK, Olesen NJ, Waltzek TB. Unpublished.



35. de Groof A, Guelen L, Deijs M, van der Wal Y, Miyata M, Ng KS, van Grinsven L, Simmelink B, Biermann Y, Grisez L, van Lent J, de Ronde A, Chang SF, Schrier C, van der Hoek L. A Novel Virus Causes Scale Drop Disease in *Lates calcarifer*. *PLoS Pathog*. 2015; 11:e1005074.
36. Boyer M, Yutin N, Pagnier I, Barrassi L, Fournous G, Espinosa L, Robert C, Azza S, Sun S, Rossmann MG, Suzan-Monti M, La Scola B, Koonin EV, Raoult D. Giant Marseillevirus highlights the role of amoebae as a melting pot in emergence of chimeric microorganisms. *Proc Natl Acad Sci USA* 2009;106:21848-21853.
37. Thomas V, Bertelli C, Collyn F, Casson N, Telenti A, Goesmann A, Croxatto A, Greub G. Lausannevirus, a giant amoebal virus encoding histone doublets. *Environ Microbiol* 2011;13:1454-1466.
38. Doutre G, Philippe N, Abergel C, Claverie JM. Genome analysis of the first *Marseilleviridae* representative from Australia indicates that most of its genes contribute to virus fitness. *J Virol* 2014;88:14340-14349.
39. Takemura M. Draft genome sequence of tokyovirus, a member of the family *Marseilleviridae* isolated from the Arakawa river of Tokyo. *Japan Genome Announc* 2016;4:e00429-16.
40. Fischer MG, Allen MJ, Wilson WH, Suttle CA. Giant virus with a remarkable complement of genes infects marine zooplankton. *Proc Natl Acad Sci USA* 2010;107: 19508-19513.
41. Legendre M, Santini S, Rico A, Abergel C, Claverie JM. Breaking the 1000-gene barrier for mimivirus using ultra-deep genome and transcriptome sequencing. *Virology* 2011;8:99.
42. Yoosuf N, Yutin N, Colson P, Shabalina SA, Pagnier I, Robert C, Azza S, Klose T, Wong J, Rossmann MG, La Scola B, Raoult D, Koonin EV. Related giant viruses in distant locations and different habitats: *Acanthamoeba polyphaga* mousmouvirus represents a third Lineage of the *Mimiviridae* that is close to the megavirus lineage. *Genome Biol Evol* 2012;4:1324-1330.
43. Arslan D, Legendre M, Seltzer V, Abergel C, Claverie JM. Distant mimivirus relative with a larger genome highlights the fundamental features of *Megaviridae*. *Proc Natl Acad Sci USA* 2011;108:17486-17491.
44. Legendre M, Lartigue A, Bertaux L, Jeudy S, Bartoli J, Lescot M, Alempic JM, Ramus C, Bruley C, Labadie K, Shmakova L, Rivkina E, Coute Y, Abergel C, Claverie JM. In-depth study of *Mollivirus sibericum*, a new 30,000-y-old giant virus infecting *Acanthamoeba*. *Proc Natl Acad Sci USA* 2015;112:E5327-E5335.
45. Philippe N, Legendre M, Doutre G, Coute Y, Poirot O, Lescot M, Arslan D, Seltzer V, Bertaux L, Bruley C, Garin J, Claverie JM, Abergel C. Pandoraviruses: amoeba viruses with genomes up to 2.5 Mb reaching that of parasitic eukaryotes. *Science*, 2013;341:281-286.
46. Scheid P. Viruses in close associations with free-living amoebae. *Parasitol Res* 2015;114:3959-3967.
47. Fitzgerald LA, Graves MV, Li X, Pfitzner AJP, Hartigan J, Van Etten JL. Sequence and annotation of the 288-kb ATCV-1 virus that infects an endosymbiotic *Chlorella* strain of the heliozoon *Acanthocystis turfacea*. *Virology* 2007;362:350-361.
48. Yanai-Balser GM, Duncan GA, Eudy JD, Wang D, Li X, Agarkova IV, Dunigan DD, Van Etten JL. Microarray analysis of *Paramecium bursaria* chlorella virus 1 transcription. *J Virol* 2010;84: 532-542.

49. Fitzgerald LA, Graves MV, Li X, Feldblyum T, Nierman WC, Van Etten JL. Sequence and annotation of the 369-kb NY-2A and the 345-kb AR158 viruses that infect *Chlorella* NC64. *Virology* 2007;358:472-484.
50. Fitzgerald LA, Graves MV, Li X, Feldblyum T, Hartigan J, Van Etten JL. Sequence and annotation of the 314-kb MT325 and the 321-kb FR483 viruses that infect *Chlorella* Pbi. *Virology* 2007;358:459-471.
51. Wilson WH, Schroeder DC, Allen MJ, Holden MT, Parkhill J, Barrell BG, Churcher C, Hamlin N, Mungall K, Norbertczak H, Quail MA, Price C, Rabinowitsch E, Walker D, Craigon M, Roy D, Ghazal P. Complete genome sequence and lytic phase transcription profile of a Coccolithovirus. *Science* 2005;309:1090-1092.
52. Delaroque N, Bothe G, Pohl T, Knippers R, Mueller DG, Boland W. The complete nucleotide sequence of the *Ectocarpus siliculosus* virus genome. *Virology* 2011;287:112-132.
53. Schroeder DC, Park Y, Yoon HM, Lee YS, Kang SW, Meints RH, Ivey RG, Choi TJ. Genomic analysis of the smallest giant virus--*Feldmannia* sp. Virus 158. *Virology* 2009;384:223-232.
54. Derelle E, Ferraz C, Escande ML, Eychenie S, Cooke R, Piganeau G, Desdevises Y, Bellec L, Moreau H, Grimsley N. Life-cycle and genome of OtV5, a large DNA virus of the pelagic marine unicellular green alga *Ostreococcus tauri*. *PLoS ONE* 2008;3:e2250.
55. Moreau H, Piganeau G, Desdevises Y, Cooke R, Derelle E, Grimsley N. Marine prasinovirus genomes show low evolutionary divergence and acquisition of protein metabolism genes by horizontal gene transfer. *J Virol* 2010;84:12555-12563.
56. Derelle E, Monier A, Cooke R, Worden A.Z, Grimsley NH, Moreau H. Diversity of Viruses Infecting the Green Microalga *Ostreococcus lucimarinus*. *J Virol* 2015;89:5812-5821.
57. Weynberg KD, Allen MJ, Ashelford K, Scanlan DJ, Wilson WH. From small hosts come big viruses: the complete genome of a second *Ostreococcus tauri* virus, OtV-1. *Environ Microbiol* 2009;11:2821-2839.
58. Weynberg KD, Allen MJ, Gilg IC, Scanlan DJ, Wilson WH. Genome sequence of *Ostreococcus tauri* Virus OtV-2 throws light on the role of picoeukaryote niche separation in the ocean. *J. Virol.* 2011;85:4520-4529.
59. Zhang W, Zhou J, Liu T, Yu Y, Pan Y, Yan S, Wang Y. Four novel algal virus genomes discovered from Yellowstone Lake metagenomes. *Sci Rep* 2015;5:15131.
60. Santini S, Jeudy S, Bartoli J, Poirot O, Lescot M, Abergel C, Barbe V, Wommack KE, Noordeloos AA, Brussaard CP, Claverie JM. Genome of *Phaeocystis globosa* virus PgV-16T highlights the common ancestry of the largest known DNA viruses infecting eukaryotes. *Proc Natl Acad Sci USA* 2013;110:10800-10805.
61. Moniruzzaman M, LeClerc GR, Brown CM, Gobler CJ, Bidle KD, Wilson WH, Wilhelm SW. Genome of brown tide virus (AaV), the little giant of the *Megaviridae*, elucidates NCLDV genome expansion and host-virus coevolution. *Virology* 2014;466-467:60-70.
62. Gallot-Lavallee L, Pagarete A, Legendre M, Santini S, Sandaa RA, Himmelbauer H, Ogata H, Bratbak G, Claverie JM. The 474-kilobase-pair complete genome sequence of CeV-01B, a virus infecting *Haptolina* (*Chrysochromulina*) *ericina* (*Prymnesiophyceae*). *Genome Announc* 2015;3:e01413-5.
63. Legendre M, Bartoli J, Shmakova L, Jeudy S, Labadie K, Adrait A, Lescot M, Poirot O, Bertaux L, Bruley C, Coute Y, Rivkina E, Abergel C, Claverie JM. Thirty-thousand-year-old distant relative of

giant icosahedral DNA viruses with a pandoravirus morphology. *Proc Natl Acad Sci USA* 2014;111:4274-4279.

64. Mitsuhashi W, Miyamoto K, Wada S. The complete genome sequence of the alphaentomopoxvirus *Anomala cuprea* entomopoxvirus, including its terminal hairpin loop sequences, suggests a potentially unique mode of apoptosis inhibition and mode of DNA replication. *Virology* 2014;452-453:95-116.

65. Bawden AL, Glassberg KJ, Diggans J, Shaw R, Farmerie W, Moyer RW. Complete genomic sequence of the *Amsacta moorei* entomopoxvirus: analysis and comparison with other poxviruses. *Virology* 2000;274:120-139.

66. Theze J, Takatsuka J, Li Z, Gallais J, Doucet D, Arif B, Nakai M, Herniou EA. New insights into the evolution of Entomopoxvirinae from the complete genome sequences of four entomopoxviruses infecting *Adoxophyes honmai*, *Choristoneura biennis*, *Choristoneura rosaceana*, and *Mythimna separata*. *J Virol* 2013;87:7992-8003.

67. Afonso CL, Tulman ER, Lu Z, Oma E, Kutish GF, Rock DL. The genome of *Melanoplus sanguinipes* entomopoxvirus. *J Virol* 1999;73:533-552.

68. Gjessing MC, Yutin N, Tengs T, Senkevich T, Koonin EV, Ronning HP, Alarson M, Ylving S, Lie K-I, Saure B, Tran L, Moss B, Dale O.B. Salmon gill poxvirus, the deepest representative of the *Chordopoxvirinae*. *J Virol* 2015;89:9348-9367.

69. Tulman ER, Afonso CL, Lu Z, Zsak L, Kutish GF, Rock DL. The genome of canarypox virus. *J Virol* 2004;78:353-366.

70. Offerman K, Carulei O, van der Walt AP, Douglass N, Williamson AL. The complete genome sequences of poxviruses isolated from a penguin and a pigeon in South Africa and comparison to other sequenced avipoxviruses. *BMC Genomics*. 2014;15:463.

71. Banyai K, Palya V, Denes B, Glavits R, Ivanics E, Horvath B, Farkas SL, Marton S, Balint A, Gyuranecz M, Erdelyi K, Dan A. Unique genomic organization of a novel Avipoxvirus detected in turkey (*Meleagris gallopavo*). *Infect Genet Evol* 2015;35:221-229.

72. Afonso CL, Tulman ER, Lu Z, Zsak L, Kutish GF, Rock DL. The genome of fowlpox virus. *J Virol* 2000;74:3815-3831.

73. Tulman ER, Afonso CL, Lu Z, Zsak L, Sur JH, Sandybaev NT, Kerembekova UZ, Zaitsev VL, Kutish GF, Rock DL. The genomes of sheeppox and goatpox viruses. *J Virol* 2002;76:6054-6061.

74. Tulman ER, Afonso CL, Lu Z, Zsak L, Kutish GF, Rock DL. Genome of lumpy skin disease virus. *J Virol* 2001;75:7122-7130.

75. Zhao G, Droit L, Tesh RB, Popov VL, Little NS, Upton C, Virgin HW, Wang D. The Genome of Yoka poxvirus. 2011;85:10230-10238.

76 Afonso CL, Delhon G, Tulman ER, Lu Z, Zsak A, Becerra VM, Zsak L, Kutish GF, Rock DL. Genome of deerpox virus. *J Virol* 2005;79:966-977.

77. Afonso CL, Tulman ER, Delhon G, Lu Z, Viljoen GJ, Wallace DB, Kutish GF, Rock DL. Genome of crocodilepox virus. *J Virol* 2006;80:4978-4991.

78. Johnston JB, Barrett JW, Nazarian SH, Goodwin M, Ricciuto D, Wang G, McFadden G. A poxvirus-encoded pyrin domain protein interacts with ASC-1 to inhibit host inflammatory and apoptotic responses to infection. *Immunity* 2005;23:587-598.

79. Willer DO, McFadden G, Evans DH. The complete genome sequence of Shope (rabbit) fibroma virus. *Virology* 1999;264:319-343.
80. Senkevich TG, Bugert JJ, Sisler JR, Koonin EV, Darai G, Moss B. Genome sequence of a human tumorigenic poxvirus: prediction of specific host response-evasion genes. *Science* 1996;273:813-816.
81. Afonso CL, Tulman ER, Lu Z, Zsak L, Zaitsev VL, Kerembekova UZ, Sandybaev NT, Kutish GF, Rock DL. The genome of camelpox virus. *Virology* 2002;295:1-9.
82. Hu FQ, Smith CA, Pickup DJ. Cowpox virus contains two copies of an early gene encoding a soluble secreted form of the type II TNF receptor. *Virology* 1994;204:343-356.
83. Chen N, Buller RM, Wall EM, Upton C. Analysis of host response modifier ORFs of ectromelia virus, the causative agent of mousepox. *Virus Res* 2000;66:155-173.
84. Shchelkunov SN, Totmenin AV, Babkin IV, Safronov PF, Ryazankina OI, Petrov NA, Gutorov VV, Uvarova EA, Mikheev MV, Sisler JR, Esposito JJ, Jahrling PB, Moss B, Sandakhchiev LS. Human monkeypox and smallpox viruses: genomic comparison. *FEBS Lett* 2001;509:66-70.
85. Fleischauer C, Upton C, Victoria J, Jones GJ, Roper RL. Genome sequence and comparative virulence of raccoonpox virus: The first North American poxvirus sequence. *J Gen Virol* 2015;96:2806-28021.
86. Esposito JJ, Sammons SA, Frace AM, Osborne JD, Olsen-Rasmussen M, Zhang M, Govil D, Damon IK, Kline R, Laker M, Li Y, Smith GL, Meyer H, Leduc JW, Wohlhueter RM. Genome sequence diversity and clues to the evolution of variola (smallpox) virus. *Science* 2006;313:807-812.
87. Esposito JJ, Moss B, Sammons SA, Frace AM, Olsen-Rasmussen M, Osborne J, Baroudy BM, Wohlhueter R. Direct Submission.
88. Shchelkunov SN, Totmenin AV, Sandakhchiev LS. Analysis of the nucleotide sequence of 23.8 kbp from the left terminus of the genome of variola major virus strain India-1967. *Virus Res* 1996;40:169-183.
89. Delhon G, Tulman ER, Afonso CL, Lu Z, de la Concha-Bermejillo A, Lehmkuhl HD, Piccone ME, Kutish GF, Rock DL. Genomes of the parapoxviruses ORF virus and bovine papular stomatitis virus. *J Virol* 2004;78:168-177.
90. Friederichs S, Stefan K, Helmut B, Heike L, Mathias B. Parapoxvirus (PPV) of red deer reveals sub-clinical infection and confirms a unique species. *J Gen Virol* 2015;96:1446-1462.
91. Hautaniemi M, Ueda N, Tuimala J, Mercer AA, Lahdenpera J, McInnes, C.J. The genome of pseudocowpoxvirus: comparison of a reindeer isolate and a reference strain. *J Gen Virol* 2010;91:1560-1576.
92. Afonso CL, Tulman ER, Lu Z, Zsak L, Osorio FA, Balinsky C, Kutish GF, Rock DL. The genome of swinepox virus. *J Virol* 2002;76:783-790.
93. Brunetti CR, Amano H, Ueda Y, Qin J, Miyamura T, Suzuki T, Li X, Barrett JW, McFadden G. Complete genomic sequence and comparative analysis of the tumorigenic poxvirus yaba monkey tumor virus. *J Virol* 2003;77:13335-13347.
94. Lee HJ, Essani K, Smith GL. The genome sequence of Yaba-like disease virus, a yatapoxvirus. *Virology* 2001;281:170-192.

95. Darby AC, McInnes CJ, Kjaer KH, Wood AR, Hughes M, Martensen PM, Radford AD, Hall N, Chantrey J.
96. Afonso PP, Silva PM, Schnellrath LC, Jesus DM, Hu J, Yang Y, Renne R, Attias M, Condit RC, Moussatche N, Damaso CR. Biological characterization and next-generation genome sequencing of the unclassified cotia virus SPAn232 (*Poxviridae*). *J Virol*, 2012;86:5039-5054.
97. Rost B. Twilight zone of protein sequence alignments. *Protein Eng Des Sel* 1999;12:85-94.
98. Yutin N, Wolf YI, Raoult D, Koonin EV. Eukaryotic large nucleo-cytoplasmic DNA viruses: clusters of orthologous genes and reconstruction of viral genome evolution. *Viol J*. 2009; 6:223.
99. Townsley AC, Senkevich TG, Moss B. Vaccinia virus A21 virion membrane protein is required for cell entry and fusion. *J Virol* 2005; 79: 9458-9469.
100. Osborne RJ, Symonds TM, Sriskantha A, Lai-Fook J, Fernon CA, Dall DJ. An entemopoxvirus homologue of the vaccinia virus D13L-encoded 'rifampicin resistance' protein. *J Gen Virol* 1996; 77: 839-346.
101. Senkevich TG, Ward BM, Moss B. Vaccinia virus A28L gene encodes an essential protein component of the virion membrane with intramolecular disulfide bonds formed by the viral cytoplasmic redox pathway. *J Virol* 2004; 78: 2348-2356.
102. Finn RD, Coggill P, Eberhardt RY, Eddy SR, Mistry J, Mitchell AL, Potter SC, Punta M, Qureshi M, Sangrador-Vegas A, Salazar GA, Tate J, Bateman A. The Pfam protein families database: towards a more sustainable future. *Nucleic Acids Res* 2016;44:D279-D285
